1 **Title:** The fate of carbon in a mature forest under carbon dioxide enrichment

2 M. Jiang<sup>1</sup>, B.E. Medlyn<sup>1</sup>, J.E. Drake<sup>1,2</sup>, R.A. Duursma<sup>1</sup>, I.C. Anderson<sup>1</sup>, C.V.M. Barton<sup>1</sup>, M.M.  
3 Boer<sup>1</sup>, Y. Carrillo<sup>1</sup>, L.Castañeda-Gómez<sup>1</sup>, L. Collins<sup>1,3,4</sup>, K.Y. Crous<sup>1</sup>, M.G. De Kauwe<sup>5</sup>, K.M.  
4 Emmerson<sup>6</sup>, S.L. Facey<sup>1,7</sup>, A.N. Gherlenda<sup>1</sup>, T.E. Gimeno<sup>1,8,9</sup>, S. Hasegawa<sup>1,10</sup>, S.N. Johnson<sup>1</sup>,  
5 C.A. Macdonald<sup>1</sup>, K. Mahmud<sup>1</sup>, B.D. Moore<sup>1</sup>, L. Nazaries<sup>1</sup>, U.N. Nielsen<sup>1</sup>, N.J. Noh<sup>1</sup>, R.  
6 Ochoa-Hueso<sup>1,11</sup>, V.S. Pathare<sup>1,12</sup>, E. Pendall<sup>1</sup>, J. Pineiro<sup>1</sup>, J.R. Powell<sup>1</sup>, S.A. Power<sup>1</sup>, P.B.  
7 Reich<sup>1,13</sup>, A.A. Renchon<sup>1</sup>, M. Riegler<sup>1</sup>, P. Rymer<sup>1</sup>, R.L. Salomón<sup>14</sup>, B.K. Singh<sup>1,15</sup>, B. Smith<sup>1,16</sup>,  
8 M.G. Tjoelker<sup>1</sup>, J.K.M. Walker<sup>1</sup>, A. Wujeska-Klaue<sup>1</sup>, J. Yang<sup>1</sup>, S. Zaehle<sup>17</sup>, and D.S.  
9 Ellsworth<sup>1</sup>

10

11 **Affiliation:**

12 <sup>1</sup>Hawkesbury Institute for the Environment, Western Sydney University, Locked Bag 1797,  
13 Penrith, NSW, 2751, Australia

14 <sup>2</sup>Department of Forest and Natural Resources Management, College of Environmental Science  
15 and Forestry, State University of New York, Syracuse, NY 13210, USA.

16 <sup>3</sup>Department of Ecology, Environment and Evolution, La Trobe University, Bundoora, VIC  
17 3086, Australia

18 <sup>4</sup>Arthur Rylah Institute for Environmental Research, Department of Environment, Land, Water  
19 and Planning, PO Box 137, Heidelberg, VIC 3084, Australia

20 <sup>5</sup>ARC Centre of Excellence for Climate Extremes, University of New South Wales, Sydney,  
21 NSW 2052, Australia

22 <sup>6</sup>Climate Science Centre, CSIRO Oceans & Atmosphere, Aspendale. VIC 3195, Australia.

23 <sup>7</sup>Department of Ecology, Swedish University of Agricultural Sciences (SLU), Uppsala, 75007,  
24 Sweden.

25 <sup>8</sup>Basque Centre for Climate Change, Leioa, 48940, Spain.

26 <sup>9</sup>Ikerbasque, Basque Foundation for Science, 48008 Bilbao, Spain.

27 <sup>10</sup>Department of Forest Ecology and Management, Swedish University of Agricultural  
28 Sciences (SLU), Umeå, SE-90183, Sweden.

29 <sup>11</sup>Department of Biology, IVAGRO, University of Cádiz, Campus de Excelencia Internacional  
30 Agroalimentario (CeiA3), Campus del Rio San Pedro, 11510 Puerto Real, Cádiz, Spain

31 <sup>12</sup>School of Biological Sciences, Post Office Box 646340, Washington State University,  
32 Pullman, WA 99164-6340, USA

33 <sup>13</sup>Department of Forest Resources, University of Minnesota, St Paul, Minnesota, 55108, USA

34 <sup>14</sup>Laboratory of Plant Ecology, Faculty of Bioscience Engineering, Ghent University, Coupure  
35 links 653, 9000 Ghent, Belgium.

36 <sup>15</sup>Global Centre for Land Based Innovation, Western Sydney University, Building L9, Locked  
37 Bag 1797, Penrith South, NSW, 2751, Australia

38 <sup>16</sup>Department of Physical Geography and Ecosystem Science, Lund University, 22362, Lund,  
39 Sweden

40 <sup>17</sup>Max Planck Institute for Biogeochemistry, Hans-Knöll-Str. 10, 07745 Jena, Germany

41 **Abstract**

42 Atmospheric carbon dioxide enrichment (eCO<sub>2</sub>) can enhance plant carbon uptake and  
43 growth<sup>1,2,3,4,5</sup>, thereby providing an important negative feedback to climate change by slowing  
44 the rate of increase of the atmospheric CO<sub>2</sub> concentration<sup>6</sup>. While evidence gathered from  
45 young aggrading forests has generally indicated a strong CO<sub>2</sub> fertilization effect on biomass  
46 growth<sup>3,4,5</sup>, it is unclear whether mature forests respond to eCO<sub>2</sub> in a similar way. In mature  
47 trees and forest stands<sup>7,8,9,10</sup>, photosynthetic uptake has been found to increase under eCO<sub>2</sub>  
48 without any apparent accompanying growth response, leaving an open question about the fate  
49 of additional carbon fixed under eCO<sub>2</sub><sup>4,5,7,8,9,10,11</sup>. Here, using data from the first ecosystem-  
50 scale Free-Air CO<sub>2</sub> Enrichment (FACE) experiment in a mature forest, we constructed a  
51 comprehensive ecosystem carbon budget to track the fate of carbon as the forest responds to  
52 four years of eCO<sub>2</sub> exposure. We show that, although the eCO<sub>2</sub> treatment of ambient +150 ppm  
53 (+38%) induced a 12% (+247 gCm<sup>-2</sup>yr<sup>-1</sup>) increase in carbon uptake through gross primary  
54 production, this additional carbon uptake did not lead to increased carbon sequestration at the  
55 ecosystem level. Instead, the majority of the extra carbon was emitted back into the atmosphere  
56 via several respiratory fluxes, with increased soil respiration alone contributing ~50% of the  
57 total uptake surplus. Our results call into question the predominant thinking that the capacity  
58 of forests to act as carbon sinks will be generally enhanced under eCO<sub>2</sub>, and challenge the  
59 efficacy of climate mitigation strategies that rely on CO<sub>2</sub> fertilization as a driver of increased  
60 carbon sinks in standing forests and afforestation projects.

61

62 **Main text**

63 Globally, forests act as a large carbon sink, absorbing ~30% of total anthropogenic CO<sub>2</sub>  
64 emissions<sup>1,12</sup>, an ecosystem service that has tremendous social and economic value. Whether

65 mature forests will remain carbon sinks into the future is of critical importance for aspirations  
66 to limit climate warming to no more than 1.5 °C above pre-industrial levels<sup>13</sup>. Free-Air CO<sub>2</sub>  
67 Enrichment (FACE) experiments provide an opportunity to determine the capacity of  
68 ecosystems to sequester carbon under the higher atmospheric CO<sub>2</sub> concentrations expected in  
69 the future<sup>3,4,5,7,8,10,11</sup>. Evidence gathered from the four first generation forest FACE  
70 experiments, which all measured responses of rapidly-growing young forest plantations, has  
71 generally indicated a strong CO<sub>2</sub> fertilization effect on biomass growth<sup>3,4</sup>. This CO<sub>2</sub> fertilization  
72 effect has been hypothesized to be one of the largest drivers of the terrestrial carbon sink and  
73 its acceleration in recent decades<sup>14</sup>, potentially accounting for up to 60% of present-day  
74 terrestrial carbon sequestration<sup>2</sup>. Given that younger trees are generally more responsive to  
75 rising CO<sub>2</sub> than mature trees<sup>11</sup>, extrapolating evidence collected from these experiments may  
76 be argued to provide an upper limit on how much carbon can be stored by global forests under  
77 eCO<sub>2</sub><sup>15</sup>. However, evidence from experiments with older trees suggests that although eCO<sub>2</sub>  
78 increases leaf photosynthesis to a similar degree as in young forests, stimulation of biomass  
79 growth and carbon storage may be lower or absent<sup>7,8,9,10</sup>. Reconciling these conflicting  
80 observations is a crucial step towards quantifying the carbon sequestration capacity of mature  
81 forests in the future. It requires that we identify the fate of the extra carbon fixed under eCO<sub>2</sub>  
82 in these complex ecosystems, which are expected to be closer to a state of equilibrium between  
83 carbon uptake and turnover, compared to young growing stands.

84

85 The *Eucalyptus* FACE (EucFACE) experiment is the world's first replicated, ecosystem-scale  
86 mature forest FACE experiment (Extended Data Figure 1). It is established in a warm-  
87 temperate evergreen forest that has remained undisturbed for the past 90 years and that is  
88 dominated by regionally widespread tree *Eucalyptus tereticornis*. The site is characterized by  
89 soils of low fertility with an understorey dominated by native grasses and shrubs. Seven

90 ecosystem-scale models were used to predict the eCO<sub>2</sub> response at EucFACE in advance of the  
91 experiment<sup>16</sup>, highlighting three alternative hypotheses for the expected ecosystem response  
92 based on plausible assumptions incorporated in different models<sup>17</sup>. These hypotheses were: (i)  
93 enhanced photosynthesis under eCO<sub>2</sub> would lead to increased biomass accumulation; (ii) eCO<sub>2</sub>-  
94 induced increase in photosynthesis would be directly down-regulated by limited nutrient  
95 availability; or (iii) eCO<sub>2</sub>-induced increase in photosynthesis would lead to increased  
96 autotrophic respiration<sup>16</sup>. This range of predictions among a suite of well-tested models  
97 indicated a prognostic knowledge gap as to how the carbon cycling of mature forests would  
98 respond to the expected rise in CO<sub>2</sub> concentration<sup>11</sup>, which is crucial to resolve in the face of  
99 future carbon-climate uncertainty<sup>18</sup>.

100

101 To date, both canopy trees and understorey plants at EucFACE have shown increased rates of  
102 leaf photosynthesis but the canopy trees showed no significant increase in aboveground  
103 biomass growth under eCO<sub>2</sub><sup>7</sup>, reflecting a similar lack of response observed in other eCO<sub>2</sub>  
104 experiments on mature trees<sup>8,9,10</sup>. Incorporating leaf-scale gas exchange measurements into a  
105 process-based tree stand model, it was estimated that the observed +19% stimulation of light-  
106 saturated overstorey leaf photosynthesis<sup>7</sup> corresponded to a +12% stimulation of whole-canopy  
107 gross primary production (GPP) response to eCO<sub>2</sub><sup>19</sup>. However, the probable fate of the extra  
108 carbon fixed under eCO<sub>2</sub> remained undetermined. Where did the extra carbon go?

109

110 To answer this question, we compiled measurements on all major carbon pools and fluxes  
111 collected over four years of experimental treatment (2013-2016), including individual and  
112 aggregated biomass and associated fluxes measured or inferred from plants, litter, soil,  
113 microbes, and insects, and constructed an ecosystem carbon budget (Figure 1) under both  
114 ambient (aCO<sub>2</sub>) and eCO<sub>2</sub> conditions (+150 ppm). We first confirmed mass balance of the

115 ecosystem carbon budget by checking agreement between independent estimates of GPP and  
116 soil respiration ( $R_{\text{soil}}$ ) derived from separate data streams (Extended Data Figure 2; see  
117 Methods). For GPP of the aCO<sub>2</sub> plots, we confirmed that a process-based model estimate of  
118 overstorey and understorey GPP ( $2059 \pm 211 \text{ gCm}^{-2}\text{yr}^{-1}$ ), driven by site-specific meteorology  
119 and physiological data, agreed with the sum of data-driven estimates of net primary production  
120 (NPP) and autotrophic respiration ( $1968 \pm 80 \text{ gCm}^{-2}\text{yr}^{-1}$ ). The carbon-use efficiency  
121 (NPP/GPP) of this mature forest was estimated to be  $0.29 \pm 0.02$ , which is on the low end of  
122 global forest estimates, but consistent with studies that have found this ratio tends to decline  
123 with stand age<sup>20</sup>. We further confirmed carbon mass balance for  $R_{\text{soil}}$  of the aCO<sub>2</sub> plots by  
124 comparing soil chamber-based estimates ( $1097 \pm 86 \text{ gCm}^{-2}\text{yr}^{-1}$ ) with the sum of litterfall and  
125 independently estimated root respiration ( $1036 \pm 27 \text{ gCm}^{-2}\text{yr}^{-1}$ ), assuming no change in soil  
126 carbon pool (see Methods). This agreement between independent estimates of components of  
127 the ecosystem carbon budget gives confidence that our measurements captured the pools and  
128 fluxes of carbon with low aggregate uncertainty and hence allows us to infer the fate of the  
129 extra carbon fixed under eCO<sub>2</sub>.

130  
131 To accommodate the inherent pre-treatment plot differences (see Methods), we normalized the  
132 CO<sub>2</sub> responses across plots by using a linear mixed-model with plot-specific pre-treatment leaf  
133 area index as a covariate<sup>21,22</sup>. The un-normalized eCO<sub>2</sub> responses are provided in Extended  
134 Data Figure 3, and generally confirm the findings but with less statistical precision. Our  
135 normalized responses (Figure 2, Extended Data Figure 4) showed that eCO<sub>2</sub> induced an average  
136 of 12% increase ( $+247 \pm 195 \text{ gCm}^{-2}\text{yr}^{-1}$ , mean  $\pm$  one standard deviation) in carbon uptake,  
137 including contributions of overstorey ( $+192 \pm 157 \text{ gCm}^{-2}\text{yr}^{-1}$ ) and understorey GPP ( $+55 \pm 17$   
138  $\text{gCm}^{-2}\text{yr}^{-1}$ ). The fate of this additional carbon entering the system under eCO<sub>2</sub> was primarily  
139 traced to an increase in  $R_{\text{soil}}$  ( $+128.8 \pm 95.2 \text{ gCm}^{-2}\text{yr}^{-1}$ , or 52% of the carbon uptake surplus),

140 followed by a smaller increase in stem respiration ( $R_{\text{stem}}$ ;  $+50.2 \pm 47.2 \text{ gCm}^{-2}\text{yr}^{-1}$ , or 20% of  
141 the carbon uptake surplus). In comparison, the increase in total NPP ( $+54 \pm 12.9 \text{ gCm}^{-2}\text{yr}^{-1}$ , or  
142 22% of the carbon uptake surplus) was similar in magnitude to the increase in  $R_{\text{stem}}$ , but the  
143 increase in storage of the total carbon pools at the ecosystem-level was much smaller ( $\Delta C_{\text{pools}}$ ;  
144  $+22.3 \pm 176.4 \text{ gCm}^{-2}\text{yr}^{-1}$ , or 9% of the carbon uptake surplus). There was thus little evidence  
145 of additional carbon accumulation under  $e\text{CO}_2$  in this mature forest ecosystem. We then  
146 compared three alternative methods (see Methods) of estimating net ecosystem production  
147 (NEP; Figure 3). All three indicated that the ecosystem remained close to carbon-neutral under  
148 ambient  $\text{CO}_2$  over the experimental period (mean  $\pm$  SD for the methods:  $74 \pm 258$ ,  $-35 \pm 142$ ,  
149  $115 \pm 96 \text{ gCm}^{-2}\text{yr}^{-1}$ , respectively), and that  $e\text{CO}_2$  of +150 ppm did not result in statistically  
150 significant increases in ecosystem carbon storage ( $149 \pm 261$ ,  $-92 \pm 216$ ,  $137 \pm 230 \text{ gCm}^{-2}\text{yr}^{-1}$ ,  
151 respectively).

152

153 The relatively small but positive NPP response to  $e\text{CO}_2$  was mainly driven by the understorey  
154 aboveground NPP response ( $\text{NPP}_{\text{ua}}$ ;  $+50.3 \pm 14.6 \text{ gCm}^{-2}\text{yr}^{-1}$ ), which was 93% of the net NPP  
155 response (Figure 2). However, this significant  $\text{NPP}_{\text{ua}}$  response did not result in an equivalent  
156  $e\text{CO}_2$  effect on understorey aboveground biomass increment ( $+27.2 \pm 24.2 \text{ gCm}^{-2}\text{yr}^{-1}$ ),  
157 suggesting a possible higher understorey biomass turnover under  $e\text{CO}_2$ . Smaller fluxes, often  
158 neglected in other ecosystem carbon budgets, such as leaf consumption by insect herbivores  
159 ( $\text{NPP}_{\text{ins}}$ ;  $25.5 \pm 4.3$  vs.  $27.8 \pm 6.3 \text{ gCm}^{-2}\text{yr}^{-1}$ ,  $a\text{CO}_2$  vs.  $e\text{CO}_2$  mean  $\pm$  SD), insect frass production  
160 (Frass;  $10.5 \pm 1.8$  vs.  $11.4 \pm 2.6 \text{ gCm}^{-2}\text{yr}^{-1}$ ), vegetation volatile carbon emission (VC;  $5.0 \pm$   
161  $0.12$  vs.  $4.3 \pm 0.07 \text{ gCm}^{-2}\text{yr}^{-1}$ ), net ecosystem methane uptake ( $\text{CH}_4$ ;  $0.17 \pm 0.04$  vs.  $0.17 \pm 0.04$   
162  $\text{gCm}^{-2}\text{yr}^{-1}$ ), and leaching of dissolved organic carbon (DOC;  $0.16 \pm 0.02$  vs.  $0.17 \pm 0.02 \text{ gCm}^{-2}$   
163  $\text{yr}^{-1}$ ), contributed to the closure of the overall ecosystem carbon budget (Figure 1; Extended

164 Data Figure 2), but were not important in explaining pathways of the carbon uptake surplus  
165 under eCO<sub>2</sub> (Figure 2, Extended Data Figure 4).

166

167 Here we provide some of the first replicated experimental evidence on the probable fate of  
168 carbon under eCO<sub>2</sub> in intact mature forests. We found that increased R<sub>soil</sub> accounted for ~50%  
169 of the extra photosynthate produced by plants under eCO<sub>2</sub>. It has been suggested that the  
170 increase in R<sub>soil</sub> at EucFACE was likely a consequence of increased root and rhizosphere  
171 respiration<sup>23,24</sup>, in contrast to other FACE sites where increased R<sub>soil</sub> was attributed to enhanced  
172 soil organic matter decomposition (e.g. DukeFACE<sup>25</sup>). Here, the eCO<sub>2</sub>-induced increase in R<sub>soil</sub>  
173 was not accompanied by substantial changes in pools of fine root (+7.9 ± 8.4 gCm<sup>-2</sup>yr<sup>-1</sup>),  
174 microbial (+2.5 ± 2.9 gCm<sup>-2</sup>yr<sup>-1</sup>), mycorrhizal (+0.5 ± 0.4 gCm<sup>-2</sup>yr<sup>-1</sup>), leaf litter (-1.7 ± 6.2  
175 gCm<sup>-2</sup>yr<sup>-1</sup>) or soil carbon (-23.8 ± 130.3 gCm<sup>-2</sup>yr<sup>-1</sup>), suggesting that the additional carbon fixed  
176 under eCO<sub>2</sub> may have led to an enhanced carbon transport belowground and a rapid  
177 belowground turnover of this flux. An initial enhancement in nitrogen and phosphorus  
178 mineralization was observed<sup>26</sup>, which suggested that the increased R<sub>soil</sub> with eCO<sub>2</sub> could reflect  
179 soil organic matter priming with the potential to alleviate plant nutrient stress in this  
180 phosphorus-deprived environment<sup>26,27</sup>. However, the enhanced soil mineralization rate and  
181 associated increase in nutrient availability did not persist over time<sup>26</sup>, indicating that this  
182 increased belowground carbon allocation and the rapid turnover of this flux was not effective  
183 in increasing phosphorus availability to the plants<sup>7,28</sup>.

184

185 The ecosystem carbon budget presented here provides an opportunity to confront the three  
186 alternative hypotheses of the response of this system to eCO<sub>2</sub> treatment that emerged from  
187 model predictions made in advance of the experiment<sup>16</sup>. Our data do not support any of the  
188 three hypotheses. The eCO<sub>2</sub>-induced increase in photosynthesis was not strongly down-



189 regulated by low nutrient availability; nor did the eCO<sub>2</sub>-induced additional carbon uptake lead  
190 to additional biomass accumulation, or enhanced aboveground respiration<sup>16</sup>. These predictions  
191 reflect common mechanisms by which terrestrial vegetation models implement nutrient  
192 limitation of the eCO<sub>2</sub> response<sup>16,17,29,30</sup>. In contrast, our results suggest a direct connection  
193 between plant photosynthesis and belowground activity, in which increased belowground  
194 carbon allocation increased soil respiration at a rate that accounted for half of the extra carbon  
195 fixed under eCO<sub>2</sub>. This increased soil respiration has been demonstrated by some models to be  
196 an important and often overlooked mechanism that reduces global soil carbon sequestration  
197 relative to estimates by many current models<sup>31</sup>. As a consequence of including this rapid  
198 turnover of the increased belowground carbon allocation in terrestrial biosphere models, the  
199 time lag in emitting some of the extra carbon via biomass accumulation and litterfall input into  
200 the soils may be reduced, thereby leading to faster cycling of carbon<sup>32</sup> and therefore possible  
201 different trajectories of carbon-climate predictions for the future.

202

203 A major form of land-based climate mitigation actions envisaged in the Paris Agreement is to  
204 enhance forest biomass carbon stocks globally through the protection of existing, largely  
205 mature, forests, and through afforestation of new areas. The mitigation potential of forests lies  
206 in the accumulated stock of ecosystem carbon, not in the short-term rate of forest  
207 photosynthesis. The probable fate of additional carbon determined in our study (Figure 2)  
208 challenges the current thinking that non-aggrading mature forests can contribute to enhanced  
209 carbon sinks due to CO<sub>2</sub> fertilization<sup>33</sup>, which further questions the allowable CO<sub>2</sub> emission  
210 targets sourced from existing carbon cycle models<sup>13,34</sup>. Given that the effect of CO<sub>2</sub> fertilization  
211 may be one of diminishing returns over time<sup>14</sup>, the statistically insignificant eCO<sub>2</sub> effect on  
212 NEP (Figure 3), if representative of mature forest ecosystems generally, suggests an even  
213 weaker carbon sink in the future, especially in low fertility systems such as EucFACE. Future

214 research efforts should target a deeper understanding of the nutrient-carbon feedbacks that  
215 likely constrain the carbon sink potential of mature forests under eCO<sub>2</sub>, and evaluate the  
216 implications of a potentially weaker terrestrial land carbon sink in the development of robust  
217 mitigation strategies in the face of climate change.  
218

## 219 **Methods**

### 220 **EucFACE site description**

221 The EucFACE facility (Extended Data Figure 1) is located in a mature evergreen *Eucalyptus*  
222 forest on an alluvial spodosol in western Sydney, Australia (33°36'S, 150°44'E). The site has  
223 been a remnant patch of native Cumberland Plain woodland since the 1880's and has remained  
224 unmanaged for at least the past 90 years, with *Eucalyptus tereticornis* Sm. as the dominant tree  
225 species. *Eucalyptus* trees occur naturally across Australia, accounting for 78% of native forest  
226 area in Australia<sup>35</sup> and are planted widely around the globe<sup>36</sup>. Infrastructure for six large  
227 circular plots (490 m<sup>2</sup> each) was established in 2010. Starting on 18<sup>th</sup> September 2012, three  
228 plots were subjected to free-air CO<sub>2</sub> enrichment treatment using computer-controlled pre-  
229 dilution method. The CO<sub>2</sub> concentrations at EucFACE were ramped up over a six-month  
230 period, increasing by +30 ppm every five weeks in discrete steps (+30, 60, 90, 120, and 150  
231 ppm). The full elevated CO<sub>2</sub> treatment of +150 ppm started on 6<sup>th</sup> February 2013 during  
232 daylight hours over all days of the year. The site is characterized by a humid temperate-  
233 subtropical transitional climate with a mean annual temperature of 17.5°C and a mean annual  
234 precipitation of 800 mm (Figure S1). The soil is a Holocene alluvial soil of low-fertility with  
235 low phosphorus content<sup>7,37</sup>. Soil texture is a loamy sand (> 75% sand content) up to 50 cm in  
236 depth. From ca. 50 to 300 cm depth, soils are sandy clay loam, with > 30% silt and clay.  
237 Average bulk density is 1.39, 1.69 and 1.71 g cm<sup>-3</sup> for depths of 0-10, 10-20 and 20-30 cm,  
238 respectively (Figure S2). Permanent groundwater depth is ~11 m below the soil surface<sup>38</sup>.  
239 Understorey vegetation is a diverse mixture of 86 species including forbs, graminoids and  
240 shrubs<sup>39</sup>. The dominant understorey species is *Microlaena stipoides*, a C3 perennial grass that  
241 accounted for ~70 % of herbaceous biomass, and responded rapidly to rainfall variability<sup>40</sup>.  
242

## 243 **Estimates of carbon pools and fluxes**

244 We estimated plot-specific carbon pools and fluxes at EucFACE over 2013-2016 (Extended  
245 Data Table 1). We defined pools as a carbon reservoir and annual increments as the annual  
246 change in the size of each reservoir. We compartmentalized the ecosystem into 10 carbon pools,  
247 namely overstorey leaf ( $C_{ol}$ ), stem ( $C_{stem}$ ), fine root ( $C_{froot}$ ), coarse root ( $C_{croot}$ ), understorey  
248 aboveground ( $C_{ua}$ ), soil ( $C_{soil}$ ), microbe ( $C_{micr}$ ), mycorrhizae ( $C_{myco}$ ), leaf litter ( $C_{lit}$ ), and  
249 aboveground insect ( $C_{ins}$ ) carbon pools, and reported pool size in the unit of  $gCm^{-2}$ . We defined  
250 fluxes as components of the carbon flow through the system, and report them in the unit of  
251  $gCm^{-2}yr^{-1}$ . All annual incremental changes in carbon pools were reported in  $gCm^{-2}yr^{-1}$  with a  
252 symbol  $\Delta$ . We converted estimates of biomass into carbon content using variable-specific  
253 carbon fractions ( $f$ ) defined in Extended Data Table 2. Below we describe how each pool and  
254 flux was estimated.

255

### 256 Pools

257 **Soil carbon pool ( $C_{soil}$ ; Figure S2)** was estimated based on quarterly sampled soil carbon  
258 content (oven-dried at 40 °C for 48 hours) and plot-specific soil bulk density at three depths (0  
259 - 10 cm, 10 - 20 cm, 20 - 30 cm). Out of the 15 dates when samples were taken, only 3 of these  
260 measured soil carbon content below the top 10 cm of soil. To obtain a more accurate estimate  
261 of annual incremental change in soil carbon pool, we therefore reported soil carbon pool for  
262 the top 10 cm only. There were no temporal and  $eCO_2$  trends in soil carbon content at deeper  
263 depths.

264

265 **Overstorey leaf carbon pool ( $C_{ol}$ ; Figure S3)** was estimated based on continuous measures of  
266 leaf area index (LAI) and specific leaf area (SLA), following  $C_{ol} = LAI \times SLA \times f_{ol}$ , where  $f_{ol}$

267 is a carbon fraction constant for overstorey leaf (Extended Data Table 2). Daily averages of  
268 plot-specific LAI were estimated based on the attenuation of diffuse radiation in a homogenous  
269 canopy<sup>22</sup>. The number of observations varies between days, depending on the number of 30-  
270 minute cloudy periods. SLA was estimated based on time-series measures of leaf mass per area  
271 (LMA), and was then linearly interpolated to plot-specific daily values over time.

272

273 **Stem carbon pool ( $C_{\text{stem}}$ ; Figure S4)** was estimated based on tree-specific height and diameter  
274 at breast height (DBH) measurements, and an allometric scaling relationship derived based on  
275 *E. tereticornis*<sup>7,41</sup>. DBH changes were measured repeatedly at roughly one month intervals at  
276 1.3 m height. Bark was periodically removed from under the dendrometer bands - this effect  
277 on DBH was considered by calculating biomass once per year using December data only. Stem  
278 biomass data were summed for each plot and averaged over the plot area to obtain ground-  
279 based estimates, and was then converted into  $C_{\text{stem}}$  using treatment-specific carbon fraction  
280 (Extended Data Table 2).

281

282 **Understorey aboveground carbon pool ( $C_{\text{ua}}$ ; Figure S5)** was estimated at 1-3 month intervals  
283 between February 2015 and December 2016 using non-destructive measurements of plant  
284 height obtained from stereo-photography<sup>42</sup>. In each of the four 2m x 2m understorey  
285 monitoring subplots within each plot, stereo photographs were collected using a Bumblebee  
286 XB3 stereo camera (Point Grey Research) mounted ~2.4 m above the ground surface and facing  
287 vertically downwards towards the center of the subplot. Stereo images were taken at dusk under  
288 diffuse light conditions to avoid measurement errors related to shadows from trees and  
289 EucFACE infrastructure. On each sampling date, three sets of stereo photographs were taken  
290 in each subplot to produce large number (i.e. 100,000s) of understorey plant height estimates  
291 from which mean plant height ( $H_{\text{mean}}$ , in m) was calculated for each plot. Understorey

292 aboveground biomass ( $B_{ua}$ , in  $\text{kg m}^{-2}$ ) for each plot was predicted from  $H_{\text{mean}}$  using an empirical  
293 model developed for the grassy understorey vegetation at EucFACE ( $B_{ua} = 1.72 * H_{\text{mean}} -$   
294  $0.05$ )<sup>42</sup>. The four subplot-level estimates were averaged to obtain a plot-level estimate of  $B_{ua}$ ,  
295 and then converted to an estimate of  $C_{ua}$  using a carbon fraction constant (Extended Data Table  
296 2).

297

298 **Root carbon pool ( $C_{\text{root}}$ )** consists of fineroot ( $C_{\text{fineroot}}$ ) and coarseroot ( $C_{\text{coarseroot}}$ ) pools, with  $C_{\text{fineroot}}$   
299 defined as roots with diameter  $< 2$  mm, with the remaining roots or woody roots defined as  
300  $C_{\text{coarseroot}}$  (Figure S6). The  $C_{\text{root}}$  pool includes roots of both overstorey and understorey vegetation.  
301 Total root carbon pool ( $C_{\text{root}}$ ) was estimated based on an allometric relationship between root  
302 biomass ( $B_{\text{root}}$ ) and stand basal area (derived from DBH) derived for Australian forest species<sup>43</sup>,  
303 as follows:

$$304 \quad \ln(B_{\text{root}}) = 0.787 * \ln(\text{DBH}) + 1.218$$

305 Fineroot biomass was estimated based on standing biomass sampled at 4 subplots per plot at 2  
306 depths (0 - 10 cm and 10 - 30 cm) over the period of 2014-2015<sup>27</sup>. Plot-specific fineroot  
307 biomass was taken by summing biomass data across depths. Coarseroot biomass was estimated  
308 as the net difference between fineroot and total root biomass. The fineroot and coarseroot  
309 biomass were multiplied by the corresponding carbon fraction constants to obtain  $C_{\text{fineroot}}$  and  
310  $C_{\text{coarseroot}}$ , respectively (Extended Data Table 2).

311

312 **Microbial carbon pool ( $C_{\text{micr}}$ )** was estimated based on fumigation extraction and 0.5 M  $\text{K}_2\text{SO}_4$   
313 extraction as in Ref. 23 using samples taken at 0-10 cm soil depth over the period of 2012 -  
314 2015. Total organic carbon was determined on a Shimadzu TOC analyzer (TOC-L TNM-L;  
315 Shimadzu, Sydney, Australia), which was then multiplied by soil bulk density over the same  
316 soil depth to obtain the  $C_{\text{micr}}$  (Figure S7a).

317

318 **Mycorrhizal carbon pool ( $C_{\text{myco}}$ )** for the top 10 cm of soil was estimated via measurements  
319 of colonization of mycorrhizal in-growth bags, carbon isotopic partitioning, microbial  
320 phospholipid fatty acid abundance and  $C_{\text{micr}}$ . Nine 45  $\mu\text{m}$  nylon mesh bags (4 x 5 cm) filled  
321 with sand, which excluded roots but allowed access of fungi<sup>44</sup>, were buried in November 2014  
322 in each experimental plot and three bags were subsequently collected every four months for  
323 one year. Phospholipid-derived fatty acids (PLFA), a proxy for total microbial biomass  
324 abundance, were quantified in sand bags and native field soil following the protocol by Ref.  
325 45.  $\delta^{13}\text{C}$  values of ground subsamples of this sand, native soil carbon, and aboveground plant  
326 tissue (leaves of Eucalypts in April 2014) were used to estimate the fraction of the accumulated  
327 carbon in sand bags that was derived from plant carbon using isotopic mass balance. Due to  
328 the exclusion of roots, plant derived carbon in bags can be attributed to mycorrhiza. This plant-  
329 derived unitless fraction was then multiplied by the total concentration of PLFA in sand bags  
330 to obtain the amount of the total PLFA contributed by mycorrhiza ( $\mu\text{g PLFA} / \text{g sand}$ ). To scale  
331 this to native soil PLFA concentrations we then calculated the ratio between mycorrhizal PLFA  
332 in sand bags to total PLFA in soil (representing the total microbial pool). Subsequently, to  
333 estimate  $C_{\text{myco}}$ , this ratio was multiplied by the  $C_{\text{micr}}$  in each plot (Figure S7b).

334

335 **Leaf litter carbon pool ( $C_{\text{lit}}$ )** was estimated based on leaf litter decomposition rate and leaf  
336 litterfall data collected by litter baskets (Figure S8)<sup>22</sup>. Leaf litter decomposition rates were  
337 estimated over 24 months using litter bags. Briefly, 2 g air-dried *Eucalyptus* litter was added  
338 to 10 x 15 cm litter bags with a 2-mm mesh size. Twelve litter bags were randomly allocated  
339 to 4 subplots within each treatment plot, and two litter bags were collected at 3, 6, 9, 12, 18  
340 and 24 months to calculate mass loss over time (mass loss was averaged across the two  
341 replicates from each subplot). A leaf litter exponential decay function was estimated for each

342 plot, based on data collected over this 24-month period. Leaf litterfall was estimated from  
343 monthly collections of material from circular fine-mesh traps (each 0.2 m<sup>2</sup>) at 8 random  
344 locations for each plot. We then applied the exponential decay function with litterfall biomass  
345 to obtain  $C_{lit}$ , assuming a carbon fraction constant (Extended Data Table 2).

346

347 **Insect carbon pool ( $C_{ins}$ )** was estimated based on two different sampling techniques, with  
348 aerial insects partially estimated based on monthly dead insect data collected from circular fine-  
349 mesh traps of 0.2 m<sup>2</sup> at 8 random locations for each plot<sup>46</sup>, and understory insects estimated  
350 based on vacuum suction sampling from 2 locations for each plot<sup>47</sup>. The vacuum suction  
351 method collected invertebrates from understorey vegetation in two 1 x 1 m subplots using a  
352 petrol-powered ‘G-Vac’ vacuum device run on full-throttle for 20 s, for a total of 5 sampling  
353 campaigns. Trapping locations were randomly chosen and fixed between sampling campaigns.  
354 All invertebrates were sorted from debris, dried to constant weight at 60°C and weighed on a  
355 microbalance with an accuracy of 1 µg. We assume that vacuum samples as well as litter trap  
356 samples represent point estimates of invertebrate abundance. Then, the total biomass of  
357 sampled invertebrates was summed across sampling methods within each plot. A constant  
358 carbon fraction based on Ref. 48 (Extended Data Table 2) was used to convert biomass into  
359  $C_{ins}$  pool (Figure S9).

### 360 Ecosystem carbon uptake fluxes

361 **Overstorey gross primary production ( $GPP_O$ )** for each plot was provided by a stand-level  
362 model simulation (MAESTRA), forced by hourly meteorological data and interpolated  
363 photosynthetic parameters measured at the site (Figure S10a)<sup>19</sup>. In MAESTRA, each plot  
364 consists of individual tree crowns that are located and parameterized with measured  
365 coordinates, crown size, and LAI. Each crown was divided into six layers, with leaf area  
366 uniformly distributed into each layer. Within each layer, the model simulated twelve points.



367 The radiation at each grid point considered shading from upper crown and surrounding trees,  
368 solar angle (zenith and azimuth), and light source (diffused or direct). According to the  
369 radiation, the leaf area at each grid point was divided into sunlit and shaded leaves, which was  
370 used to calculate gas exchange using a Farquhar<sup>49</sup> type formulation for photosynthesis.  
371 Calculations for carbon flux were parameterized with *in situ* leaf gas exchange  
372 measurements<sup>7,50</sup>. Respiration and its temperature dependence were also quantified using data  
373 collected on site. The output was evaluated against measured canopy-scale transpiration data<sup>19</sup>.  
374  
375 Similarly, **understorey GPP ( $GPP_u$ )** (Figure S10b) was simulated using MAESTRA with  
376 photosynthetic parameters taken for the grass *Microlaena stipoides*<sup>40</sup>. The parameterization of  
377 understorey vegetation is different from that of the canopy. In each plot, the understorey was  
378 assumed to form a single crown covering the whole plot (i.e., a circle with 12.5 m radius) at a  
379 height of 1.5 m. The LAI of the understorey was estimated using phenology camera digital  
380 photographs taken at four permanent understorey vegetation monitoring subplots in each plot<sup>42</sup>.  
381 The average green pixel content was calculated from three photos in each subplot, and assumed  
382 to be the same as the fraction of absorbed PAR. We then assumed a light extinction coefficient  
383 of 0.5 in Beers' Law and calculated understorey LAI. Before 2014 there were 3 campaigns per  
384 year while from 2014 the cameras were automated, and we used the fortnightly averages. Leaf  
385 gas exchange parameters were obtained from Ref. 40 and covered four to six campaigns per  
386 year from 2013 to 2016. We estimated a one-time  $g_1$  parameter<sup>51</sup> for all plots and time, and  
387 assumed constant carboxylation rate ( $V_{cmax}$ ) and electron transport rate ( $J_{max}$ ) values at 25 °C  
388 across plots. Basal leaf respiration rate and the temperature dependence of photosynthesis and  
389 respiration were assumed to be the same as the canopy. The understorey simulation was  
390 conducted separately from the canopy, with canopy LAI from Ref. 22 included to account for  
391 the shading from the canopy, branches and stems on the understorey.

392

393 For the **methane net flux (CH<sub>4</sub>)**, air samples were collected following the closed-chamber  
394 method (or Non-Flow-Through Non-Steady-State [NFT-NSS] method). Seven replicated  
395 chambers were available for each plot. Headspace samples were collected monthly, over a  
396 period of one hour and analyzed by gas chromatography. Fluxes were estimated by a mixture  
397 of linear and quadratic regressions (depending on goodness-of-fit), assuming a constant air  
398 pressure of one atm and correcting the air temperature inside the chambers for each air  
399 sample<sup>52</sup>. The CH<sub>4</sub> fluxes are net fluxes, which represent the sum of: 1) CH<sub>4</sub> efflux (emissions  
400 from the soil into the atmosphere); 2) CH<sub>4</sub> influx (uptake from the atmosphere into soil). Here,  
401 the annual net CH<sub>4</sub> flux was an ecosystem influx and was presented as positive values (Figure  
402 S11a).

403

#### 404 Production fluxes

405 Plant **net primary production (NPP)** is the sum of overstorey leaf (NPP<sub>ol</sub>), stem (NPP<sub>stem</sub>),  
406 fine root (NPP<sub>fine</sub>), coarse root (NPP<sub>cr</sub>), other (including twigs, barks, and seeds; NPP<sub>other</sub>),  
407 understorey aboveground (NPP<sub>ua</sub>), and consumption of overstorey leaf by insect herbivores  
408 (NPP<sub>ins</sub>). NPP<sub>ol</sub> and NPP<sub>other</sub> were estimated based on monthly litter data collected from circular  
409 fine-mesh traps of 0.2 m<sup>2</sup> at eight random locations for each plot (Figure S12). Litter were  
410 sorted into leaf, twigs, bark, and seeds, dried to constant mass at 40 °C and weighed. A  
411 subsample was reweighed when dried to constant mass at 70 °C and a small moisture correction  
412 was applied to the leaf component of the whole dataset. NPP<sub>ol</sub> was computed as the sum of  
413 annual leaf litter, which excluded leaf consumption by insects. For twigs, we assumed strictly  
414 annual turnover across the years. NPP<sub>stem</sub> (Figure S13) and NPP<sub>cr</sub> (Figure S14) were  
415 estimated based on annual incremental change of stem biomass and coarse root biomass,

416 respectively.  $NPP_{\text{froot}}$  was estimated based on samples collected from the in-growth cores at 4  
417 different locations per plot (Figure S14).

418

419  $NPP_{\text{ua}}$  was estimated based on biomass clippings taken between 2015 - 2017, assuming one  
420 understorey turnover per harvest interval (Figure S15). We used a clip-strip method of biomass  
421 harvest as has been applied previously at the BioCON experiment<sup>53</sup>. Specifically, four narrow  
422 strips, each with a size of 1 m x 0.1 m, were situated in each of the experimental plots at least  
423 2 m away from the vertical pipes for FACE, while avoiding the understory shrubs. The  
424 understory herbaceous species were clipped approximately 1 cm above soil level. The total  
425 mass per harvest represents the total production. Biomass samples were oven dried for two  
426 days at 60 °C, and converted into carbon mass by applying a constant fraction (Extended Data  
427 Table 2).

428

429 NPP lost to overstorey leaf consumption by insect herbivores ( $NPP_{\text{ins}}$ ) was estimated based on  
430 insect frass data (Frass) collected from the circular fine-mesh traps, and a relationship between  
431 frass mass and insect consumed leaf mass derived based on multiple *Eucalyptus* tree species at  
432 different CO<sub>2</sub> concentrations (Figure S16a)<sup>54,55</sup>. Frass was estimated based on annual collection  
433 of frass biomass collected from the circular fine-mesh litter traps with their associated carbon  
434 content (Extended Data Table 2; Figure S16c).

435

#### 436 Outfluxes

437 Leaching lost as **dissolved organic carbon (DOC)** from soils was estimated based on  
438 concentrations of DOC in soil solutions, provided by water suction lysimeter measurements<sup>26</sup>.  
439 Lysimeters were installed to two depths (0 - 15 cm and 35 - 75 cm, which is immediately above  
440 the impermeable layer). Here we assumed that DOC reaching deeper depth is lost from the

441 system at a rate of  $20 \text{ ml m}^{-2} \text{ d}^{-1}$ , which is an estimate of the daily drainage rate at the site  
442 (Figure S11b).

443

444 **Plant autotrophic respiration ( $R_a$ )** consists of overstorey leaf ( $R_{ol}$ ), stem ( $R_{stem}$ ), root ( $R_{root}$ ),  
445 understorey aboveground ( $R_{ua}$ ) (Figure S17), and growth respiration ( $R_{grow}$ ) (Figure S18).  $R_{ol}$   
446 and  $R_{ua}$  were based on MAESPA simulation (Figure S17a, c), as described in the respective  
447 GPP sections.  $R_{grow}$  was estimated by taking a constant fraction of 30% of total NPP as  
448 measured directly on *E. tereticornis* trees<sup>56</sup>.

449

450  $R_{stem}$  was estimated from measurements of stem  $\text{CO}_2$  efflux performed in three dominant trees  
451 per plot (Figure S17b). Collars were horizontally attached to the stem at an approximate height  
452 of 0.75 m, and  $R_{stem}$  was measured with a portable infrared gas analyzer coupled to a soil  
453 respiration chamber adapted for this purpose<sup>57</sup>. Measurement campaigns were performed every  
454 one or two months from December 2017 to October 2018, and the relationship between  $R_{stem}$   
455 and air temperature ( $T_{air}$ ) was used to extrapolate  $R_{stem}$  across the surveyed period, following  
456  $R_{stem} = 0.1866 * 2.84^{T_{air}/10}$  ( $r^2 = 0.42$ ,  $p < 0.0001$ ).  $R_{stem}$  was then upscaled to the stand level  
457 considering the ratio of trunk stem axial surface per unit of soil surface measured per plot. Stem  
458 surface area was directly inferred from the Terrestrial Laser Scanning (TLS) data through  
459 quantitative structure models presented in Ref. 58 and 59. TLS data were acquired with a  
460 RIEGL VC-400 terrestrial laser scanner (RIEGL Laser Measurement Systems GmbH). Stem  
461 surface area was derived from the TLS data following a two-step approach: (i) manually  
462 extracting single tree from the registered TLS point cloud; and (ii) deriving parameters for an  
463 extracted single tree. Once a tree is extracted from the point cloud, the next step was to strip  
464 off the leaves, and segment the point cloud into stem and branches. Finally, the surface of the  
465 segments was reconstructed with geometric primitives (cylinders). The method used a cover

466 set approach, where the point cloud was partitioned into small subsets, which correspond to  
467 small connected patches in the tree surface.

468

469  $R_{\text{root}}$  was partitioned into fineroot ( $R_{\text{fineroot}}$ ) and coarse root ( $R_{\text{croot}}$ ) respiration (Figure S17d). Both  
470  $R_{\text{fineroot}}$  and  $R_{\text{croot}}$  were estimated based on soil temperature at 20 cm depth. Mass-based rates of  
471  $R_{\text{fineroot}}$  were obtained from measured rates in seedlings of *E. tereticornis*<sup>60</sup>.  $R_{\text{croot}}$  was estimated  
472 using a proxy based on measured rates of wood respiration of branches (c. 7 mm diameter) in  
473 trees (8 to 9 m height) of *E. tereticornis*<sup>61</sup>. The equations are:

474 
$$R_{\text{fineroot}} = B_{\text{fr}} * 4.425 * 2.26^{(T_{\text{soil}} - 15)/10}$$

475 
$$R_{\text{croot}} = B_{\text{cr}} * 1.33 * 2.26^{(T_{\text{soil}} - 15)/10}$$

476 where  $R_{\text{fineroot}}$  and  $R_{\text{croot}}$  are fine root and coarse root respiration rates, respectively,  $T_{\text{soil}}$  is soil  
477 temperature at 15 min interval,  $B_{\text{fr}}$  and  $B_{\text{cr}}$  are fineroot and coarse root biomass, respectively.  
478 Here we assumed fraction of coarse root at top 30 cm of soil is 60 % to represent coarse root  
479 respiration at this soil profile.

480

481 **Carbon efflux due to insect respiration ( $R_{\text{ins}}$ )** was estimated as the net difference between  
482  $\text{NPP}_{\text{ins}}$  and Frass, assuming no net change in insect biomass (Figure S16b).

483

484 **Soil respiration ( $R_{\text{soil}}$ ):** The rate of soil CO<sub>2</sub> efflux was measured at eight locations within each  
485 plot, where a permanent PVC collar inserted into the soil was co-located with soil TDR probes  
486 for continuous measurements of soil temperature (5-cm-depth) and volumetric water content  
487 (0 to 21-cm-depth; CS650-L; Campbell Scientific, Logan, UT, USA).  $R_{\text{soil}}$  was measured  
488 manually at all collar locations every 2-3 weeks, in addition to 30-minute measurements using  
489 automated chambers (Li-8100-103; Licor) at one location within each plot, resulting  
490 in >300,000 observations over the study period<sup>24</sup>. These data were used to parameterize a semi-

491 mechanistic model of  $R_{\text{soil}}$ , in which  $R_{\text{soil}}$  was predicted based on measurements of soil  
492 properties, soil physics, and measured soil temperature and volumetric water content<sup>62</sup>. This  
493 model successfully recreated the observed fluxes ( $r^2$  between predicted and observed survey  
494  $R_{\text{soil}}$  was 0.65)<sup>24</sup>. Annual sums of  $R_{\text{soil}}$  were derived by summing the averaged daily fluxes over  
495 eight locations within each plot, where daily fluxes at each location were predicted based on  
496 the semi-mechanistic model and daily soil temperature and volumetric water content data taken  
497 adjacent to each measurement collar. Soil heterotrophic respiration ( $R_{\text{hetero}}$ ) was taken as the  
498 net difference between  $R_{\text{soil}}$  and  $R_{\text{root}}$  (Figure S19). Total ecosystem respiration ( $R$ ) was  
499 calculated as the sum of  $R_a$ ,  $R_{\text{hetero}}$ ,  $R_{\text{ins}}$ , and VC.

500

501 **Volatile carbon (VC;** Figure S20) flux as isoprene ( $C_5H_8$ ) was estimated using the Model of  
502 Emissions of Gases and Aerosols from Nature (MEGAN)<sup>63</sup>. Isoprene represents over half of  
503 all VOC species emitted by vegetation globally. A MEGAN box-model was built from the  
504 version used in Ref. 64, centered on the EucFACE facility to calculate hourly emissions of  
505 isoprene across the period 2013-2016 for all six plots:

506

$$VC = EF * LAI * \gamma$$

507 Where EF is the isoprene basal emission factor,  $\gamma$  is the emission activity factor, accounting for  
508 changes in the isoprene response due to light, temperature, leaf age and soil moisture. The  
509 MEGAN simulations were driven by daily input data of LAI, soil moisture, and hourly input  
510 data of photosynthetic active radiation, temperature, atmospheric pressure, wind speed and  
511 relative humidity. The isoprene EFs were measured as 6.708  $\text{mg m}^{-2} \text{h}^{-1}$  for ambient  $\text{CO}_2$  plots  
512 and 5.704  $\text{mg m}^{-2} \text{h}^{-1}$  for elevated plots. The EFs were derived from in-line photosynthetic gas-  
513 exchange measurements coupled with simultaneous volatile isoprenoid sampling. The isoprene  
514 emissions were collected in sterile stainless steel thermal desorption tubes at the same time as  
515 gas exchange was measured, and these were capped and later thermally desorbed for off-line

516 volatile analysis in the laboratory using a Shimadzu GC/MS. The chromatographic peaks were  
 517 identified by comparing them to isoprene standards and reference mass spectra in the NIST  
 518 Mass Spectral Library (<https://www.nist.gov/srd>). The box-model produced isoprene was  
 519 converted to carbon content using the molecular weight ratio of carbon to isoprene.

520

521 Net Ecosystem Production

522 Net ecosystem production (NEP) was estimated based on three different methods that estimated  
 523 NEP in relatively independent ways (Figure 3), similar to Ref. 65. The first method considered  
 524 NEP as the difference between total ecosystem influx and total ecosystem outflux (i.e. In -  
 525 Out), which relied on both process-based modeling and empirical upscaling of respiratory  
 526 fluxes collected from the field. The second method considered NEP as NPP minus  $R_{hetero}$  (i.e.  
 527  $NPP - R_{hetero}$ ), with NPP relying mostly on litter-based production estimates, and  $R_{hetero}$  relying  
 528 on  $R_{soil}$  and  $R_{root}$  estimates. The third method considers NEP as the sum of changes in carbon  
 529 pools in the ecosystem (i.e.  $\Delta C_{pools}$ ), which was mostly determined by biomass estimates.  
 530 Equations for each method are provided below:

| Method             | NEP =                                                                                                                                                                           |
|--------------------|---------------------------------------------------------------------------------------------------------------------------------------------------------------------------------|
| In - Out           | $GPP_o + GPP_u + CH_4 - R_{ol} - R_{stem} - R_{soil} - R_{ua} - R_{ins} - DOC - VC - R_{grow}$                                                                                  |
| $NPP - R_{hetero}$ | $NPP_{ol} + NPP_{stem} + NPP_{froot} + NPP_{croot} + NPP_{other} + NPP_{ua} + NPP_{ins} - R_{hetero}$                                                                           |
| $\Delta C_{pools}$ | $\Delta C_{soil} + \Delta C_{ol} + \Delta C_{stem} + \Delta C_{croot} + \Delta C_{froot} + \Delta C_{ua} + \Delta C_{lit} + \Delta C_{ins} + \Delta C_{micr} + \Delta C_{myco}$ |

531

532 **Carbon budget evaluation**

533 We evaluated the mass balance of our estimated ecosystem carbon budget in two ways. Firstly,  
 534 we compared model simulated GPP with the aggregated sum of NPP and  $R_a$  (Extended Data  
 535 Figure 2a, b). GPP was simulated by a stand-level ecophysiological model, driven by hourly

536 meteorological data and parameterized with site-specific ecological data<sup>19</sup>. This GPP should  
537 equal to the aggregation of NPP ( $NPP_{ol} + NPP_{stem} + NPP_{froot} + NPP_{croot} + NPP_{other} + NPP_{ua} +$   
538  $NPP_{ins}$ ) and  $R_a$  fluxes ( $R_{ol} + R_{stem} + R_{root} + R_{ua} + R_{grow}$ ), which were mostly extrapolated based  
539 on field data. Secondly,  $R_{soil}$  estimated based on soil collar flux measurements<sup>23</sup> was evaluated  
540 against the sum of litterfall and  $R_{root}$  (Extended Data Figure 2c, d), assuming minimal changes  
541 in soil carbon stock (as change over this short period of time is beyond the detection limit in a  
542 complex and slow-growing mature forest ecosystem like EucFACE). Here, litterfall was the  
543 sum of  $NPP_{ol} + NPP_{froot} + NPP_{croot} + NPP_{other} + NPP_{ua} + Frass$ , and  $R_{root}$  was extrapolated based  
544 on root biomass and temperature functions.

545

#### 546 **Statistical analyses**

547 We performed linear mixed-model analysis using the “lmer” function within the “lme4”  
548 package<sup>66</sup> in software R<sup>67</sup> to determine the CO<sub>2</sub> treatment effect on all reported variables. All  
549 fluxes were reported at an annual rate ( $gCm^{-2}yr^{-1}$ ). In our model, date and CO<sub>2</sub> treatment were  
550 considered as fixed factors, plot as a random factor, and plot-specific pre-treatment LAI (i.e.  
551 4-month average LAI before full CO<sub>2</sub> treatment was switched on) as a covariate to account for  
552 pre-treatment differences among treatment plots. Normalizing all response variables with a  
553 covariate that integrates light, water and nutrient constraints helps to isolate the CO<sub>2</sub> effect<sup>21</sup>,  
554 as has been done previously at the site<sup>22</sup> and elsewhere<sup>8,21</sup>. Confidence intervals for the CO<sub>2</sub>  
555 effect size of individual variables were reported using the function “confint”, which applies  
556 quantile functions for the t-distribution after model fitting. Confidence intervals for the  
557 predicted flux and pool were reported as the standard deviation of the plot-specific totals ( $n =$   
558 3). Similarly, confidence intervals for the aggregated fluxes (e.g. NPP) were reported by  
559 summing individual component fluxes that constituent the aggregated flux for each plot and



560 computing the standard deviations across plots ( $n = 3$ ). Finally, confidence intervals for the  
561 CO<sub>2</sub> effect size ( $SD_{agg}$ ) of some aggregated fluxes (e.g. NPP) were calculated by pooling the  
562 standard deviations of the aggregated fluxes for ambient ( $SD_{amb}$ ) and elevated CO<sub>2</sub> treatment  
563 ( $SD_{ele}$ ), following:

$$SD_{agg} = \sqrt{\frac{SD_{amb}^2 + SD_{ele}^2}{2}}$$

564

565

## 566 **Data statement**

567 Data and code will be made available via Research Data Australia upon acceptance of the  
568 manuscript.

## 569   **References**

- 570       1. Le Quéré C.L. *et al.* Global carbon budget 2018. *Earth Syst. Sci. Data* **10**, 2141-2194  
571           (2018).
- 572       2. Schimel D. *et al.* Effect of increasing CO<sub>2</sub> on the terrestrial carbon cycle. *Proc. Natl.*  
573           *Acad. Sci. USA* **112**, 436-441 (2015).
- 574       3. Walker A.P. *et al.* Decadal biomass increment in early secondary successional woody  
575           ecosystems is increased by CO<sub>2</sub> enrichment. *Nat. Commun.* **10**, 454,  
576           <https://doi.org/10.1038/s41467-019-08348-1> (2019).
- 577       4. Norby R.J. & Zak D.R. Ecological lessons from Free-Air CO<sub>2</sub> Enrichment (FACE)  
578           experiments. *Annu. Rev. Ecol. Evol. Syst.* **42**, 181-203 (2011).
- 579       5. Leuzinger S. & Hattenschwiler S. Beyond global change: lessons from 25 years of CO<sub>2</sub>  
580           research. *Oecologia* **171**, 639-651 (2013).
- 581       6. Arora V.K. *et al.* Carbon-concentration and carbon-climate feedbacks in CMIP5 Earth  
582           system models. *J. Clim.* **26**, 5289-5214 (2013).
- 583       7. Ellsworth D.S. *et al.* Elevated CO<sub>2</sub> does not increase eucalypt forest productivity on a  
584           low-phosphorus soil. *Nat. Clim. Change* **7**, 279-282 (2017).
- 585       8. Körner C. *et al.* Carbon flux and growth in mature deciduous forest trees exposed to  
586           elevated CO<sub>2</sub>. *Science* **309**, 1360-1362 (2005).
- 587       9. Ryan M.G. Three decades of research at Flakaliden advancing whole-tree physiology,  
588           forest ecosystem and global change research. *Tree Physiol.* **33**, 1123-1131 (2013).
- 589       10. Klein T. *et al.* Growth and carbon relations of mature *Picea abies* trees under 5 years  
590           of free-air CO<sub>2</sub> enrichment. *J. Ecol.* **104**, 1720-1733 (2016).
- 591       11. Norby R.J. *et al.* Model-data synthesis for the next generation of forest free-air CO<sub>2</sub>  
592           enrichment (FACE) experiments. *New Phytol.* **209**, 17-28 (2016).

- 593 12. Pugh T.A.M. *et al.* Role of forest regrowth in global carbon sink dynamics. *Proc. Natl.*  
594 *Acad. Sci. USA* **116**, 4382-4387 (2019).
- 595 13. Grassi G. *et al.* The key role of forests in meeting climate targets requires science for  
596 credible mitigation. *Nat. Clim. Change* **7**, 220-226 (2017).
- 597 14. Peñuelas J. *et al.* Shifting from a fertilization-dominated to a warming-dominated  
598 period. *Nat. Ecol. Evol.* **1**, 1438-1445 (2017).
- 599 15. DeLucia E.H. *et al.* Net primary production of a forest ecosystem with experimental  
600 CO<sub>2</sub> enrichment. *Science* **285**, 1177-1179 (1999).
- 601 16. Medlyn B.E. *et al.* Using models to guide field experiments: a priori predictions for the  
602 CO<sub>2</sub> response of a nutrient- and water-limited native Eucalypt woodland. *Global*  
603 *Change Biol.* **22**, 2834-2851 (2016).
- 604 17. Medlyn B.E. *et al.* Using ecosystem experiments to improve vegetation models. *Nat.*  
605 *Clim. Change* **5**, 528-534 (2015).
- 606 18. Friedlingstein P. *et al.* Uncertainties in CMIP5 climate projections due to carbon cycle  
607 feedbacks. *J. Climate* **27**, 511-526 (2014).
- 608 19. Yang J. *et al.* Low sensitivity of gross primary production to elevated CO<sub>2</sub> in a mature  
609 Eucalypt woodland. *Biogeosci. Discuss.* (submitted).
- 610 20. De Lucia E.H. *et al.* Forest carbon use efficiency: is respiration a constant fraction of  
611 gross primary production? *Global Change Biol.* **13**, 1157-1167 (2007).
- 612 21. Norby R.J. Forest canopy productivity index. *Nature* **381**, 564 (1996).
- 613 22. Duursma R.A. *et al.* Canopy leaf area of a mature evergreen Eucalyptus woodland does  
614 not respond to elevated atmospheric CO<sub>2</sub> but tracks water availability. *Glob. Chang.*  
615 *Biol.* **22**, 1666-1676 (2016).

- 616 23. Drake J.E. *et al.* Short-term carbon cycling responses of a mature eucalypt woodland  
617 to gradual stepwise enrichment of atmospheric CO<sub>2</sub> concentration. *Glob. Chang. Biol.*  
618 **22**, 380-390 (2016).
- 619 24. Drake J.E. *et al.* Three years of soil respiration in a mature eucalypt woodland exposed  
620 to atmospheric CO<sub>2</sub> enrichment. *Biogeochemistry* **139**, 85-101 (2018).
- 621 25. Drake J.E. *et al.* Increases in the flux of carbon belowground stimulate nitrogen uptake  
622 and sustain the long-term enhancement of forest productivity under elevated CO<sub>2</sub>. *Ecol.*  
623 *Lett.* **14**, 349-357 (2011).
- 624 26. Hasegawa S. *et al.* Elevated carbon dioxide increases soil nitrogen and phosphorus  
625 availability in a phosphorus-limited Eucalyptus woodland. *Global Change Biol.* **22**,  
626 1628-1643 (2016).
- 627 27. Ochoa-Hueso R. *et al.* Rhizosphere-driven increase in nitrogen and phosphorus  
628 availability under elevated atmospheric CO<sub>2</sub> in a mature *Eucalyptus* woodland. *Plant*  
629 *Soil* **416**, 283-295 (2017).
- 630 28. Crous K.Y. *et al.* Nitrogen and phosphorus retranslocation of leaves and stemwood in  
631 a mature *Eucalyptus* forest exposed to 5 years of elevated CO<sub>2</sub>. *Front. Plant Sci.* **10**:664,  
632 doi: 10.3389/fpls.2019.00664 (2019).
- 633 29. Zaehle S. *et al.* Evaluation of 11 terrestrial carbon-nitrogen cycle models against  
634 observations from two temperature Free-Air CO<sub>2</sub> Enrichment studies. *New Phytol.* **202**,  
635 803-822 (2014).
- 636 30. Fleischer K. *et al.* Future CO<sub>2</sub> fertilization of the Amazon forest hinges on plant  
637 phosphorus use and acquisition. *Nat. Geosci.* (in press).
- 638 31. Todd-Brown K.E.O. *et al.* Changes in soil organic carbon storage predicted by earth  
639 system models during the 21<sup>st</sup> century. *Biogeosciences*, **11**, 2341-2356 (2014).

- 640 32. Kuzyakov Y. *et al.* Review and synthesis of the effects of elevated atmospheric CO<sub>2</sub> on  
641 soil processes: no changes in pools, but increased fluxes and accelerated cycles. *Soil*  
642 *Biol. Biochem.* **128**, 66-78 (2019).
- 643 33. Luysaert S. *et al.* Old-growth forests as global carbon sinks. *Nature* **455**, 213-215  
644 (2008).
- 645 34. Jones C. *et al.* 21st century compatible CO<sub>2</sub> emissions and airborne fraction simulated  
646 by CMIP5 Earth System models under 4 representative concentration pathways. *J.*  
647 *Clim.* **26**, doi:10.1175-JCLI-D-12-00554.1 (2013).
- 648 35. Australia Government Department of Agriculture, Fisheries and Forestry. Australia's  
649 agriculture, fisheries and forestry at a glance 2012. Canberra, Australia (2012).
- 650 36. Food and Agricultural Organization of the United Nations. Global Forest Resources  
651 Assessment 2000. FAO Forestry Paper 140. Rome, Italy (2001).
- 652 37. Crous, K. *et al.* Is phosphorus limiting in a mature *Eucalyptus* woodland? Phosphorus  
653 fertilization stimulates stem growth. *Plant Soil* **391**, 293-305 (2015).
- 654 38. Gimeno T.E. *et al.* Elevated CO<sub>2</sub> did not affect the hydrological balance of a mature  
655 native *Eucalyptus* woodland. *Glob. Chang. Biol.* **24**, 3010-3024 (2018).
- 656 39. Hasegawa S. *et al.* Elevated CO<sub>2</sub> concentrations reduce C4 cover and decrease diversity  
657 of understorey plant community in a *Eucalyptus* woodland. *J. Ecol.* **106**, 1483-1494  
658 (2018).
- 659 40. Pathare V.S. *et al.* Water availability affects seasonal CO<sub>2</sub>-induced photosynthetic  
660 enhancement in herbaceous species in a periodically dry woodland. *Glob. Chang. Biol.*  
661 **23**, 5164-5178 (2017).
- 662 41. Paul K.I. *et al.* Development and testing of allometric equations for estimating above-  
663 ground biomass of mixed-species environmental plantings. *For. Ecol. Manage.* **310**,  
664 483-494 (2013).

- 665 42. Collins L. *et al.* Understorey productivity in temperate grassy woodland responds to  
666 soil water availability but not to elevated CO<sub>2</sub>. *Glob. Chang. Biol.* **24**, 2366-2376  
667 (2018).
- 668 43. Snowdon P. *et al.* National carbon accounting system technical report no. 17. Australian  
669 Greenhouse Office, Canberra, Australia (2000).
- 670 44. Wallander H. *et al.* Evaluation of methods to estimate production, biomass and turnover  
671 of ectomycorrhizal mycelium in forests soils – A review. *Soil Biol. biochem.* **57**, 1034–  
672 1047 (2013).
- 673 45. Buyer J.S. & Sasser M. High throughput phospholipid fatty acid analysis of soils. *Appl.*  
674 *Soil Ecol.* **61**, 127–130 (2012).
- 675 46. Gherlenda A.N. *et al.* Boom and bust: rapid feedback responses between insect  
676 outbreak dynamics and canopy leaf area impacted by rainfall and CO<sub>2</sub>. *Glob. Chang.*  
677 *Biol.* **22**, 3632-3641 (2016).
- 678 47. Facey S.L. *et al.* Atmospheric change causes declines in woodland arthropods and  
679 impacts specific trophic groups. *Agr. Forest Entomol.* **19**, 101-112 (2017).
- 680 48. Trakimas, G. *et al.* Ecological Stoichiometry: a link between developmental speed and  
681 physiological stress in an omnivorous insect. *Front. Behav. Neurosci.*  
682 **13**:42, <https://doi.org/10.3389/fnbeh.2019.00042> (2019).
- 683 49. Farquhar G.D. *et al.* A biochemical model of photosynthetic CO<sub>2</sub> assimilation in leaves  
684 of C<sub>3</sub> species. *Planta* **149**, 78–90 (1980).
- 685 50. Gimeno T.E. *et al.* Conserved stomatal behavior under elevated CO<sub>2</sub> and varying water  
686 availability in a mature woodland. *Funct. Ecol.* **30**, 700-709 (2016).
- 687 51. Medlyn, B.E. *et al.* Reconciling the optimal and empirical approaches to modelling  
688 stomatal conductance. *Glob. Chang. Biol.* **17**, 2134–2144 (2011).

- 689 52. Martins C.S.C. *et al.* Identifying environmental drivers of greenhouse gas emissions  
690 under warming and reduced rainfall in boreal-temperate forests. *Funct. Ecol.* **31**, 2356–  
691 2368 (2017).
- 692 53. Reich P.B. *et al.* Plant diversity enhances ecosystem responses to elevated CO<sub>2</sub> and  
693 nitrogen deposition. *Nature* **410**, 809-810 (2001).
- 694 54. Gherlenda A.N. *et al.* Insect herbivory in a mature Eucalyptus woodland canopy  
695 depends on leaf phenology but not CO<sub>2</sub> enrichment. *BMC Ecol.* **16**, 47 (2016).
- 696 55. Gherlenda A.N. *et al.* Precipitation, not CO<sub>2</sub> enrichment, drives insect herbivore frass  
697 deposition and subsequent nutrient dynamics in a mature *Eucalyptus* woodland. *Plant*  
698 *Soil* **399**, 29-39 (2016).
- 699 56. Drake J.E. *et al.* The partitioning of gross primary production for young *Eucalyptus*  
700 *tereticornis* trees under experimental warming and altered water availability. *New*  
701 *Phytol.* **222**, 1298-1312 (2019).
- 702 57. Salomón R.L. *et al.* Elevated CO<sub>2</sub> does not affect stem CO<sub>2</sub> efflux nor stem respiration  
703 in dry Eucalyptus woodland, but it shifts the vertical gradient in xylem CO<sub>2</sub>. *Plant Cell*  
704 *Environ.* **42**, 2151-2164 (2019).
- 705 58. Raunonen P. *et al.* Fast Automatic Precision Tree Models from Terrestrial Laser  
706 Scanner Data. *Remote Sens.* **5**, 491-520 (2013).
- 707 59. Calders K. *et al.* Nondestructive estimates of above-ground biomass using terrestrial  
708 laser scanning. *Methods Ecol. Evol.* **6**, 198-208 (2015).
- 709 60. Drake J.E. *et al.* A common thermal niche among geographically diverse populations  
710 of the widely distributed tree species *Eucalyptus tereticornis*: No evidence for  
711 adaptation to climate-of-origin. *Glob. Chang. Biol.* **23**, 5069-5082 (2017).
- 712 61. Drake J.E. *et al.* Does physiological acclimation to climate warming stabilize the ratio  
713 of canopy respiration to photosynthesis? *New. Phytol.* **211**, 850-863 (2016).

- 714 62. Davidson E.A. *et al.* The Dual Arrhenius and Michaelis–Menten kinetics model for  
715 decomposition of soil organic matter at hourly to seasonal time scales. *Glob. Chang.*  
716 *Biol.* **18**, 371-384 (2012).
- 717 63. Guenther A.B. *et al.* The Model of Emissions of Gases and Aerosols from Nature  
718 version 2.1 (MEGAN2.1): an extended and updated framework for modeling biogenic  
719 emissions. *GeoSci. Model Dev.* **5**, 1471-1492 (2012).
- 720 64. Emmerson K.M. *et al.* Sensitivity of isoprene emissions to drought over south-eastern  
721 Australia: Integrating models and satellite observations of soil moisture, *Atmos.*  
722 *Environ.* **209**, 112-124 (2019).
- 723 65. Keith H. *et al.* Multiple measurements constrain estimates of net carbon exchange by a  
724 Eucalyptus forest. *Agric. For. Meteorol.* **149**, 535-558 (2009).
- 725 66. Bates D. *et al.* Fitting linear mixed-effects models using lme4. *J. Stat. Softw.* **67**, 1-48  
726 (2015).
- 727 67. R Core Team. R: A language and environment for statistical computing. R Foundation  
728 for Statistical Computing, Vienna, Austria. URL <https://www.R-project.org/> (2018).



## 729 **Acknowledgements**

730 EucFACE was built as an initiative of the Australian Government as part of the Nation-building  
731 Economic Stimulus Package, and is supported by the Australian Commonwealth in  
732 collaboration with Western Sydney University. We acknowledge the technical support by V.  
733 Kumar and C. McNamara, and the team of people who have assisted with data collection. The  
734 Eucalyptus tree vector in Figure 1 is from Heydon, L. *Eucalyptus spp.* Integration and  
735 Application Network, University of Maryland Center for Environmental Science  
736 ([ian.umces.edu/imagelibrary/](http://ian.umces.edu/imagelibrary/)). This work was partially supported by the following grants from  
737 the Australian Research Council: DP130102501 (to JRP and ICA), DP110105102 and  
738 DP160102452 (to DSE). RLS received funding from Research Foundation Flanders and the  
739 European Union's Horizon 2020 research and innovation programme under the Marie  
740 Skłodowska- Curie grant agreement no. 665501. RO-H. is financially supported by a Ramón  
741 y Cajal Fellowship from MICIU (RYC-2017-22032).

742

## 743 **Author contributions**

744 MJ, BEM, RAD and JED designed the synthesis, compiled the data, and performed the  
745 analyses. MJ, BEM, RAD, JED, ICA, CVMB, MMB, LC-G, YC, LC, KYC, SLF, ANG, TEG,  
746 SH, SNJ, CAM, KM, BDM, LN, UNN, NJN, RO-H, VSP, EP, JP, JRP, SAP, PBR, AAR, MR,  
747 PR, RLS, BKS, BS, MGT, JKMW, AW-K, JY and DSE collected data and contributed to data  
748 analyses. JY and BEM performed the MAESPA model simulations, with contributions from  
749 MGDK and RAD. JED and AAR performed soil respiration gap-filling and modelling. KME  
750 performed isoprene emission model simulation. MJ and LC-G conceptualized Figure 1, and  
751 LC-G implemented the graphic design. MJ wrote the initial manuscript, with significant input

752 from BEM, JED, BS, PBR, SZ, MGDK, MGT and DSE. All authors edited and approved the  
753 manuscript.

754

#### 755 **Competing financial interests**

756 None declared.

757

#### 758 **Materials and Correspondence**

759 Correspondence should be directed to MJ ([m.jiang@westernsydney.edu.au](mailto:m.jiang@westernsydney.edu.au)) and BEM  
760 ([b.medlyn@westernsydney.edu.au](mailto:b.medlyn@westernsydney.edu.au)).

761 **Figures**

762

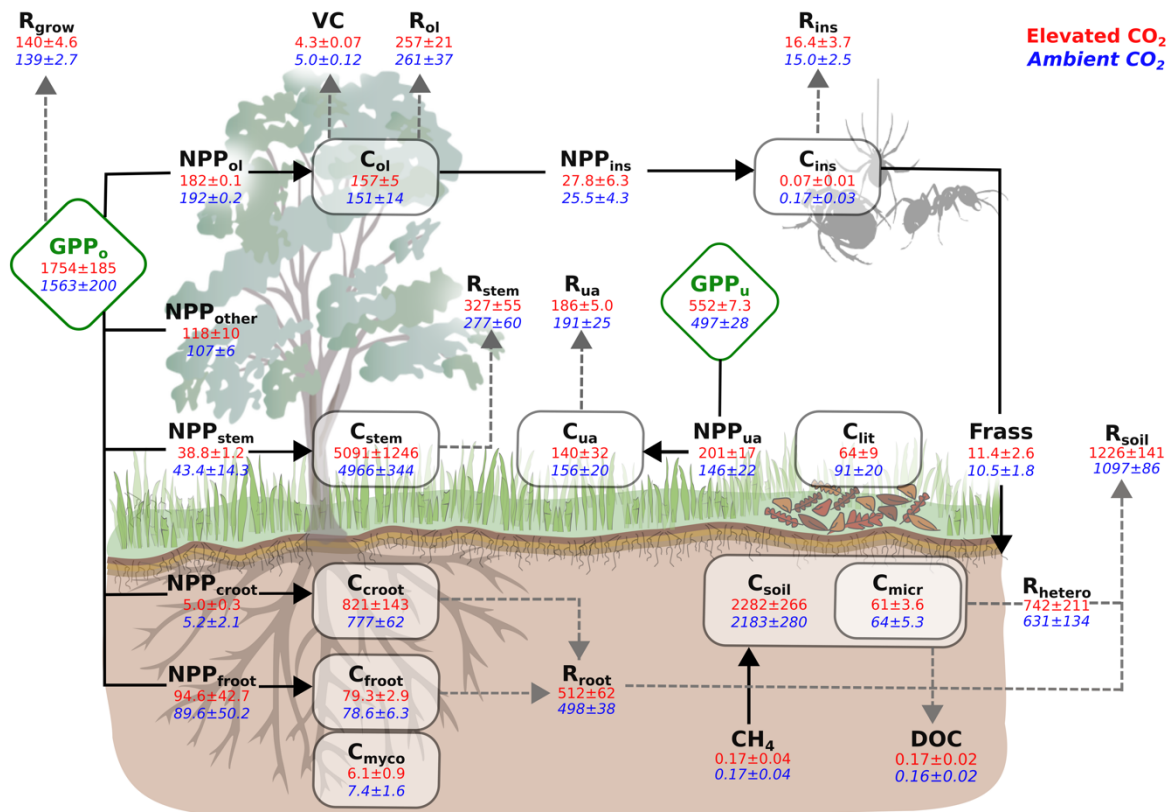

763

764 **Figure 1. A comprehensive carbon budget under ambient and elevated CO<sub>2</sub> treatment in**

765 **a mature forest ecosystem.** Diamond boxes are gross primary production for overstorey

766 (GPP<sub>o</sub>) and understorey (GPP<sub>u</sub>), respectively. Squared boxes are carbon stocks (gCm<sup>-2</sup>),

767 including overstorey leaf (C<sub>ol</sub>), stem (C<sub>stem</sub>), coarse root (C<sub>croot</sub>), fineroot (C<sub>froot</sub>), understorey

768 aboveground (C<sub>ua</sub>), leaf litter (C<sub>lit</sub>), soil (C<sub>soil</sub>), microbe (C<sub>micr</sub>), aboveground insect (C<sub>ins</sub>), and

769 mycorrhizae (C<sub>myco</sub>). Unboxed variables are carbon fluxes (gCm<sup>-2</sup>yr<sup>-1</sup>), including net primary

770 production of overstorey leaf (NPP<sub>ol</sub>), stem (NPP<sub>stem</sub>), coarse root (NPP<sub>croot</sub>), fineroot (NPP<sub>froot</sub>),

771 and understorey aboveground (NPP<sub>ua</sub>), overstorey leaf consumption by insects (NPP<sub>ins</sub>),

772 respiration fluxes of overstorey leaf (R<sub>ol</sub>), stem (R<sub>stem</sub>), root (R<sub>root</sub>), understorey aboveground

773 (R<sub>ua</sub>), growth (R<sub>grow</sub>), insect (R<sub>ins</sub>), heterotroph (R<sub>hetero</sub>), and soil (R<sub>soil</sub>), and volatile carbon

774 emission (VC), frass production (Frass), dissolved organic carbon (DOC), and soil methane net

775 uptake (CH<sub>4</sub>). Solid arrow lines are fluxes entering a pool, dotted arrow lines are fluxes leaving  
776 a pool. Blue italic values are means  $\pm$  one standard deviation of the ambient CO<sub>2</sub> treatment  
777 (n=3), whereas red values are means  $\pm$  one standard deviation of the elevated CO<sub>2</sub> treatment  
778 (n=3). All values are normalized by a linear mixed-model with plot-specific pre-treatment leaf  
779 area index as a covariate to account for pre-existing differences. Summary of variable  
780 definitions and data availability is provided in Extended Data Table 1.

781

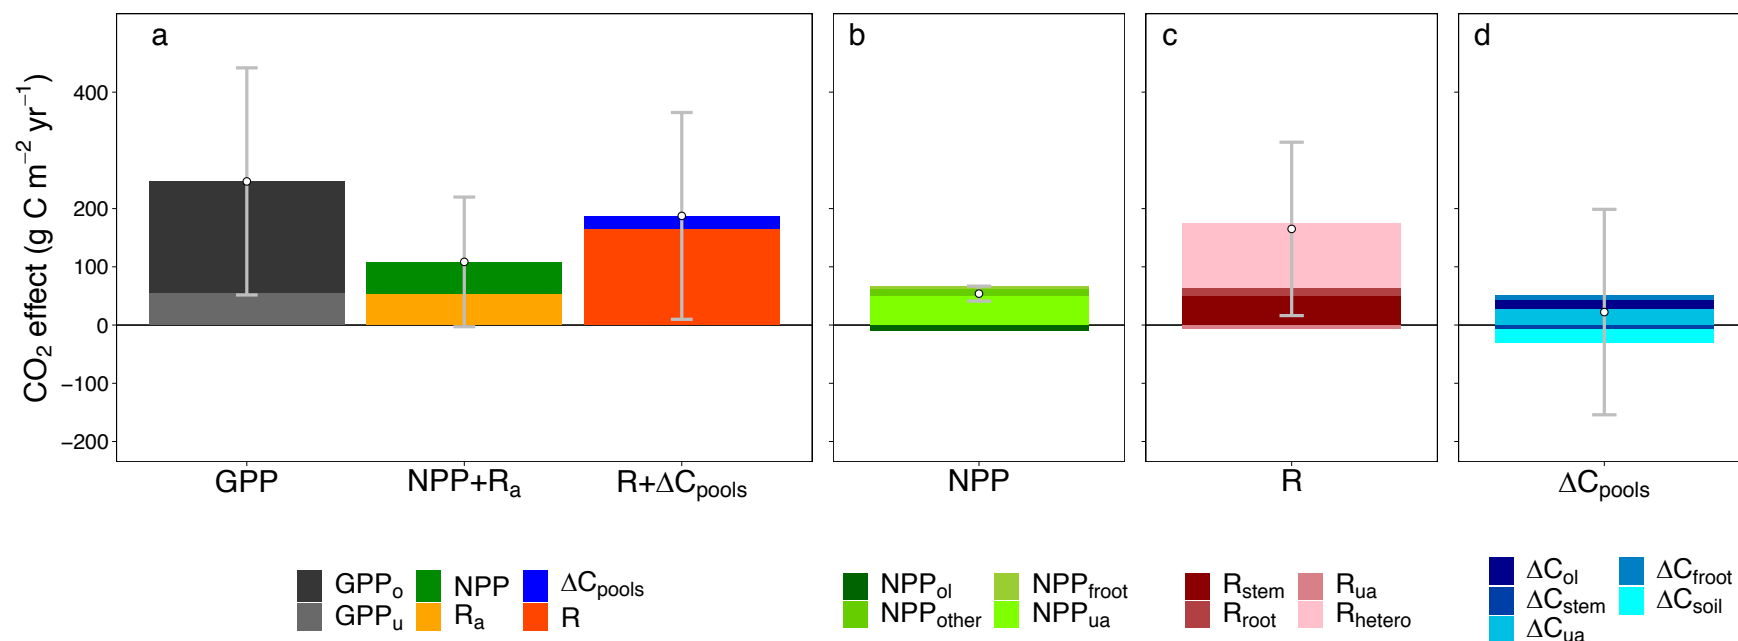

782

783 **Figure 2. The fate of additional carbon fixed under elevated CO<sub>2</sub> (eCO<sub>2</sub>) in a mature forest ecosystem. a)** Column “GPP” represents the total  
 784 eCO<sub>2</sub>-induced increases in overstorey and understorey gross primary production (GPP<sub>o</sub> and GPP<sub>u</sub>, respectively), “NPP + R<sub>a</sub>” represents the sum  
 785 of net primary production and autotrophic respiration response, “R + ΔC<sub>pools</sub>” represents the sum of ecosystem respiration and carbon storage  
 786 response. **b)** The relative contributions of individual NPP fluxes to the aggregated NPP response to eCO<sub>2</sub>, including NPP responses of overstorey  
 787 leaf (NPP<sub>ol</sub>), twigs, barks and seeds (NPP<sub>other</sub>), fineroot (NPP<sub>froot</sub>), and understorey aboveground (NPP<sub>ua</sub>); **c)** The relative contributions of individual  
 788 respiratory fluxes to the aggregated R response to eCO<sub>2</sub>, including respiration responses of stem (R<sub>stem</sub>), root (R<sub>root</sub>), understorey aboveground

789 ( $R_{ua}$ ), and soil heterotroph ( $R_{hetero}$ ); and **d**) The relative contributions of individual change in carbon storage to the aggregated  $\Delta C_{pools}$  response to  
790  $eCO_2$ , including changes in pool of overstorey leaf ( $\Delta C_{ol}$ ), stem ( $\Delta C_{stem}$ ), understorey aboveground ( $\Delta C_{ua}$ ), fineroot ( $\Delta C_{root}$ ), and soil ( $\Delta C_{soil}$ ).  
791 Variables with an absolute mean  $CO_2$  effect of  $< 5 \text{ gCm}^{-2}\text{yr}^{-1}$  are excluded from the figure for better visual clarification. Individual  $CO_2$  responses  
792 are reported in Extended Data Figure 4. Each color represents the  $CO_2$  response of a flux variable, point indicates the net sum of all variables for  
793 a column, and the grey error bar represents one standard deviation of the estimated column sum at the plot-level (see Methods). The  $CO_2$  effect is  
794 estimated using a linear mixed-model analysis with plot-specific pre-treatment leaf area index as a covariate to account for pre-existing differences  
795 (see Methods). The un-normalized response is provided in Extended Data Figure 3, which generally agrees with findings present in this figure, but  
796 with less statistical precision.

797

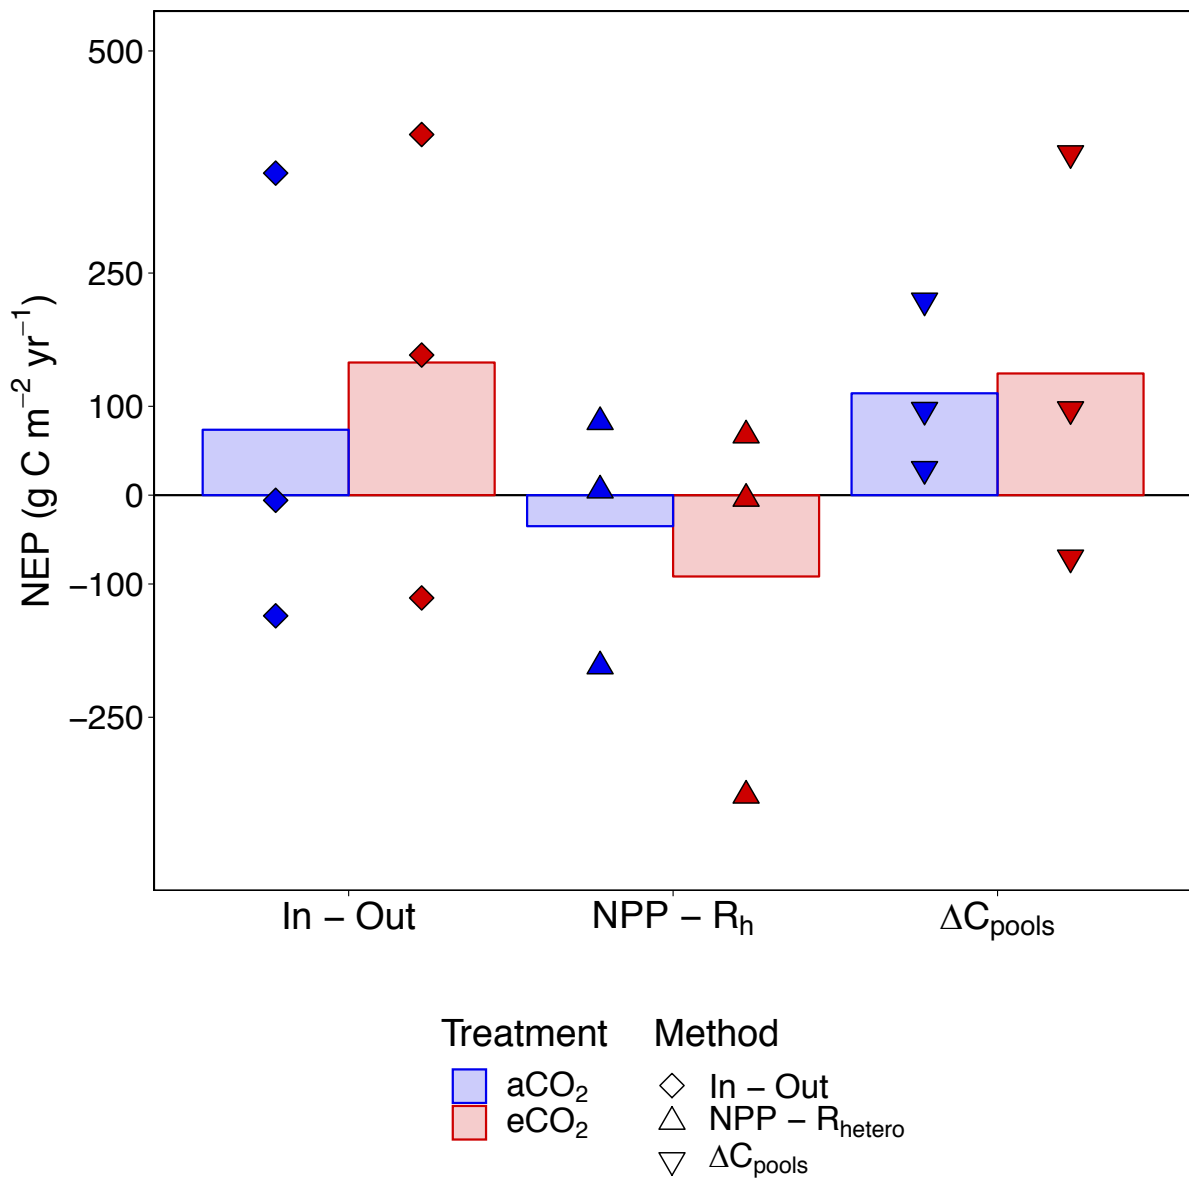

798

799 **Figure 3. Estimates of net ecosystem production (NEP) under ambient and elevated CO<sub>2</sub>**

800 **treatment at EucFACE.** Positive values indicate ecosystem net carbon uptake by the

801 ecosystem. “In - Out” calculates NEP based on the difference between total influxes and total

802 outfluxes. “NPP - R<sub>hetero</sub>” calculates NEP based on the difference between net primary

803 production (NPP) and heterotrophic respiration (R<sub>hetero</sub>). “ΔC<sub>pools</sub>” derives NEP based on

804 incremental changes in all ecosystem carbon pools. Colored bars indicate treatment means

805 based on each method (n=3), with blue representing ambient and red representing elevated CO<sub>2</sub>

806 treatment. Individual dots are plot-level NEP, derived based on different methods (see  
807 Methods). Values are normalized by a linear mixed-model with plot-specific pre-treatment leaf  
808 area index as a covariate to account for pre-existing differences. Horizontal dotted line indicates  
809 NEP equals zero.



810 **Extended Data Table 1. Definition and data availability of variables.** Data availability  
 811 includes start and end year of data included in this study. Time points indicate the number of  
 812 data collections over the available data period. Within plot sub-replicate indicate the number  
 813 of replicates within each treatment plot. The detailed methods for estimating each variable is  
 814 provided in the Method section.

| Variable                        |                    | Data coverage |          |             |                                                 |
|---------------------------------|--------------------|---------------|----------|-------------|-------------------------------------------------|
| Name                            | Symbol             | Start year    | End year | Time points | Within plot sub-replicate (plot <sup>-1</sup> ) |
| Specific Leaf Area              | SLA                | 2013          | 2016     | 50          | 3                                               |
| Leaf Area Index                 | LAI                | 2012          | 2016     | 303         | 1                                               |
| Soil bulk density               | BK                 | 2017          | 2017     | 2           | 3                                               |
| Diameter at breast height       | DBH                | 2013          | 2016     | 4           | Individual tree                                 |
| Overstorey leaf pool            | C <sub>ol</sub>    | 2012          | 2016     | 303         | 1                                               |
| Understorey aboveground pool    | C <sub>ua</sub>    | 2015          | 2016     | 16          | 4                                               |
| Overstorey stem C pool          | C <sub>stem</sub>  | 2013          | 2016     | 4           | Individual tree                                 |
| Fine root C pool                | C <sub>froot</sub> | 2014          | 2016     | 6           | 4                                               |
| Coarse root C pool              | C <sub>croot</sub> | 2013          | 2016     | 4           | Individual tree                                 |
| Forest floor leaf litter C pool | C <sub>lit</sub>   | 2013          | 2016     | 46          | -                                               |
| Microbial C pool                | C <sub>micr</sub>  | 2012          | 2015     | 15          | 4                                               |
| Soil C pool                     | C <sub>soil</sub>  | 2012          | 2014     | 11          | 4                                               |

|                                        |                     |      |      |        |                 |
|----------------------------------------|---------------------|------|------|--------|-----------------|
| Mycorrhizal C pool                     | $C_{\text{myco}}$   | 2015 | 2015 | 3      | -               |
| Insect C pool (aerial)                 | $C_{\text{ins}}$    | 2013 | 2016 | 43     | 8               |
| Insect C pool (ground dwelling)        | $C_{\text{ins}}$    | 2013 | 2015 | 5      | 4               |
| Overstorey gross primary production    | $GPP_o$             | 2013 | 2016 | Annual | 1               |
| Understorey gross primary production   | $GPP_u$             | 2013 | 2016 | Annual | 1               |
| Overstorey leaf respiration            | $R_{ol}$            | 2013 | 2016 | Annual | 1               |
| Understorey leaf respiration           | $R_{ua}$            | 2013 | 2016 | Annual | 1               |
| Stem respiration                       | $R_{\text{stem}}$   | 2012 | 2016 | Daily  | 3               |
| Root respiration                       | $R_{\text{root}}$   | 2012 | 2015 | Daily  | -               |
| Methane net flux                       | $CH_4$              | 2013 | 2016 | 35     | 7               |
| Volatile C emission flux               | VC                  | 2013 | 2016 | Daily  | 1               |
| Insect herbivore respiration           | $R_{\text{ins}}$    | 2012 | 2014 | 22     | -               |
| Dissolved organic C loss flux          | DOC                 | 2012 | 2014 | 12     | 4               |
| Soil respiration                       | $R_{\text{soil}}$   | 2012 | 2015 | Daily  | 8               |
| Growth respiration                     | $R_{\text{grow}}$   | 2012 | 2016 | Annual | 1               |
| Overstorey leaf net primary production | $NPP_{ol}$          | 2012 | 2016 | 49     | 8               |
| Stem net primary production            | $NPP_{\text{stem}}$ | 2012 | 2016 | 4      | Individual tree |

|                                                          |                      |      |      |       |                 |
|----------------------------------------------------------|----------------------|------|------|-------|-----------------|
| Fine root net primary production                         | $NPP_{\text{root}}$  | 2014 | 2016 | 5     | 4               |
| Coarse root net primary production                       | $NPP_{\text{root}}$  | 2012 | 2016 | 4     | Individual tree |
| Other net primary production (sum of twigs, bark, seeds) | $NPP_{\text{other}}$ | 2012 | 2016 | 49    | 8               |
| Twig net primary production                              | $NPP_{\text{twig}}$  | 2012 | 2016 | 49    | 8               |
| Bark net primary production                              | $NPP_{\text{bark}}$  | 2012 | 2016 | 49    | 8               |
| Seed net primary production                              | $NPP_{\text{seed}}$  | 2012 | 2016 | 49    | 8               |
| Understorey aboveground net primary production           | $NPP_{\text{ua}}$    | 2015 | 2016 | 3     | 4               |
| Frass production                                         | Frass                | 2012 | 2014 | 22    | 8               |
| Heterotrophic respiration                                | $R_{\text{hetero}}$  | 2012 | 2016 | Daily | 8               |
| Overstorey leaf insect consumption flux                  | $NPP_{\text{ins}}$   | 2012 | 2014 | 22    | -               |

815

816 **Extended Data Table 2. Carbon (C) fraction used to convert from biomass into C content.**

| Variable                                   | Symbol      | Mean value                                      | Data source                    |
|--------------------------------------------|-------------|-------------------------------------------------|--------------------------------|
| C fraction of overstorey leaf pool         | $f_{ol}$    | 0.5                                             | EucFACE data                   |
| C fraction of understorey aboveground pool | $f_{ua}$    | 0.456                                           | EucFACE data                   |
| C fraction of stem pool                    | $f_{stem}$  | 0.445 (ambient plots)<br>0.448 (elevated plots) | EucFACE data                   |
| C fraction of coarse root pool             | $f_{croot}$ | 0.445 (ambient plots)<br>0.448 (elevated plots) | Assumed the same as $f_{stem}$ |
| C fraction of fine root pool               | $f_{froot}$ | 0.40 (ambient plots)<br>0.42 (elevated plots)   | EucFACE data                   |
| C fraction of overstorey leaflitter pool   | $f_{lit}$   | 0.5                                             | EucFACE data                   |
| C fraction of aboveground insect pool      | $f_{ins}$   | 0.5                                             | Ref 48                         |
| C fraction of frass production             | $f_{frass}$ | 0.53                                            | EucFACE data                   |
| C fraction of microbial pool               | $f_{micr}$  | 0.534 (ambient plots)<br>0.493 (elevated plots) | EucFACE data                   |

|                                                 |                    |                                                 |                                       |
|-------------------------------------------------|--------------------|-------------------------------------------------|---------------------------------------|
| C fraction of mycorrhizal pool                  | $f_{\text{myco}}$  | 0.534 (ambient plots)<br>0.493 (elevated plots) | Assumed the same as $f_{\text{micr}}$ |
| C fraction of soil pool                         | $f_{\text{soil}}$  | 0.016 (ambient plots)<br>0.017 (elevated plots) | EucFACE data                          |
| C fraction of twigs, barks and seeds production | $f_{\text{other}}$ | 0.5                                             | Assumed                               |

817

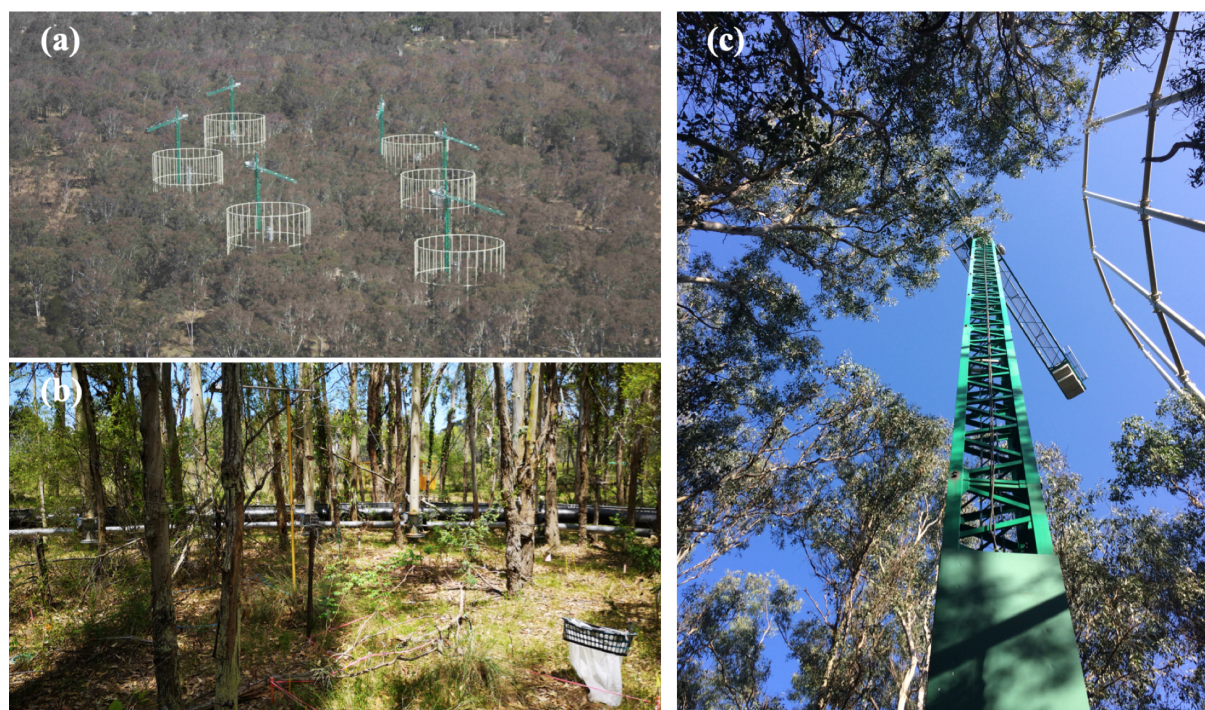

818

819 **Extended Data Figure 1. The *Eucalyptus* free air carbon dioxide enrichment experiment**  
820 **facility (EucFACE). a)** A spatial overview of the forest and the facility (photo credit: David  
821 S. Ellsworth), **b)** an overview of the understorey vegetation and infrastructure inside a plot  
822 (photo credit: Mingkai Jiang), and **c)** a bottom-up look of the canopy structure and the crane  
823 (photo credit: Mingkai Jiang).

824

825

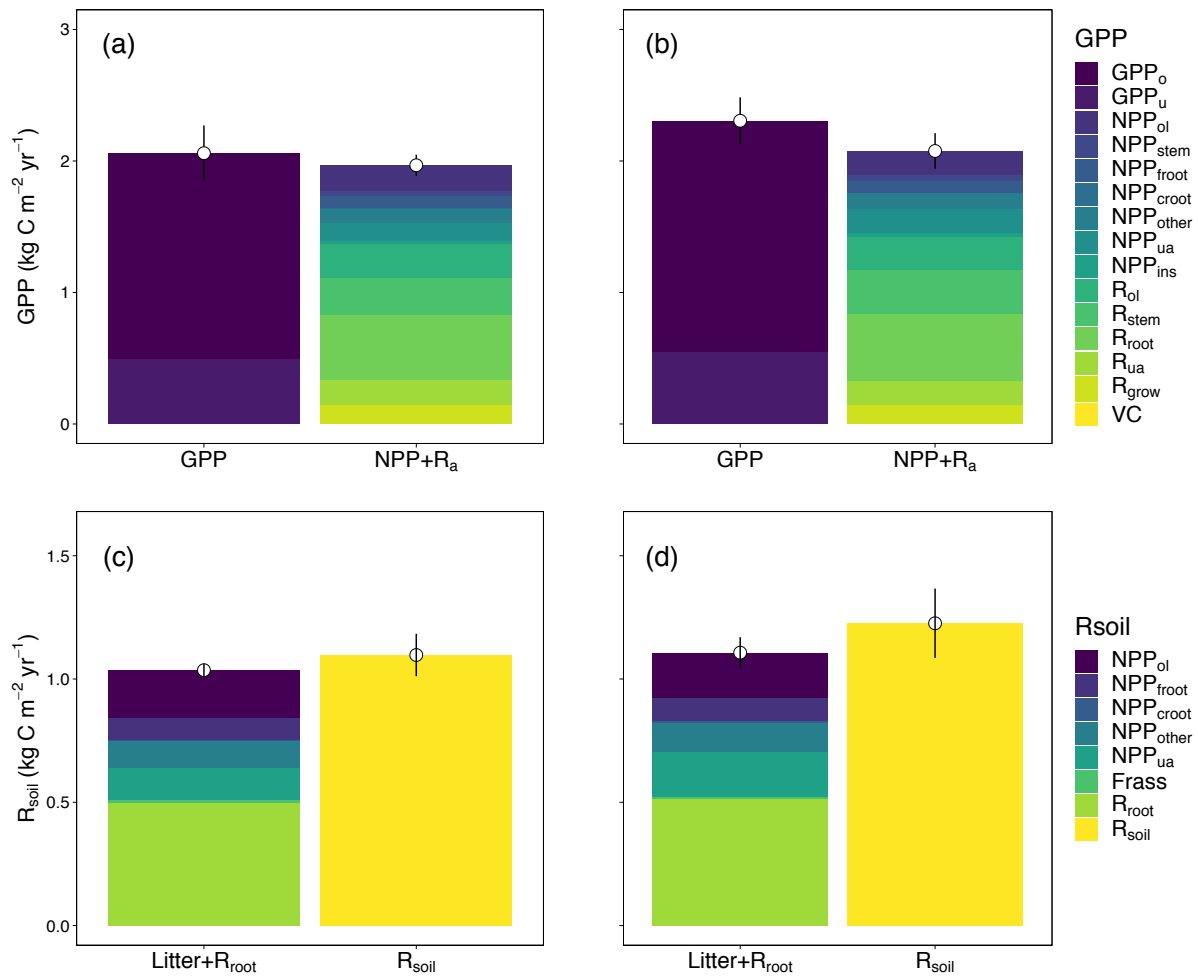

826

827 **Extended Data Figure 2. Estimates of (a and b) gross primary production (GPP) and (c**  
 828 **and d) soil respiration ( $R_{soil}$ ) based on different methods for both (a and c) ambient and**  
 829 **(b and d) elevated  $CO_2$  treatment at EucFACE. For estimates of GPP, we compared the**  
 830 **model simulated total GPP of overstorey and understorey ( $GPP_o$  and  $GPP_u$ , respectively), with**  
 831 **the sum of data-driven estimates of net primary production (NPP) and autotrophic respiration**  
 832 **( $R_a$ ), which include NPP of overstorey leaf ( $NPP_{ol}$ ), stem ( $NPP_{stem}$ ), fineroot ( $NPP_{froot}$ ), coarse**  
 833 **root ( $NPP_{croot}$ ), twigs, barks and seeds ( $NPP_{other}$ ), understorey aboveground ( $NPP_{ua}$ ), leaf**  
 834 **consumption by insects ( $NPP_{ins}$ ), and respiratory fluxes of overstorey leaf ( $R_{ol}$ ), stem ( $R_{stem}$ ),**  
 835 **root ( $R_{root}$ ), understorey aboveground ( $R_{ua}$ ), growth ( $R_{grow}$ ), and volatile carbon emission (VC).**  
 836 **For estimates of  $R_{soil}$ , we compared direct estimates of  $R_{soil}$  scaled up from soil chamber**

837 measurements, with the sum of litterfall and independent estimates of root respiration (Litter +  
838  $R_{\text{root}}$ ), assuming no net change in soil carbon stock over time. Here litterfall was inferred based  
839 on NPP of overstorey leaf ( $\text{NPP}_{\text{ol}}$ ), fineroot ( $\text{NPP}_{\text{froot}}$ ), coarse root ( $\text{NPP}_{\text{croot}}$ ), twigs, barks and  
840 seeds ( $\text{NPP}_{\text{other}}$ ), understorey aboveground ( $\text{NPP}_{\text{ua}}$ ), and frass production (Frass). These  
841 evaluations provide independent mass balance checks of the estimated ecosystem carbon  
842 budget. Each color represents a flux variable. Dotted point and vertical line represent treatment  
843 mean and standard deviation based on plot-level estimates of the aggregated flux ( $n=3$ ). Values  
844 were normalized by a linear mixed-model with pre-treatment leaf area index as a covariate to  
845 account for pre-existing differences.



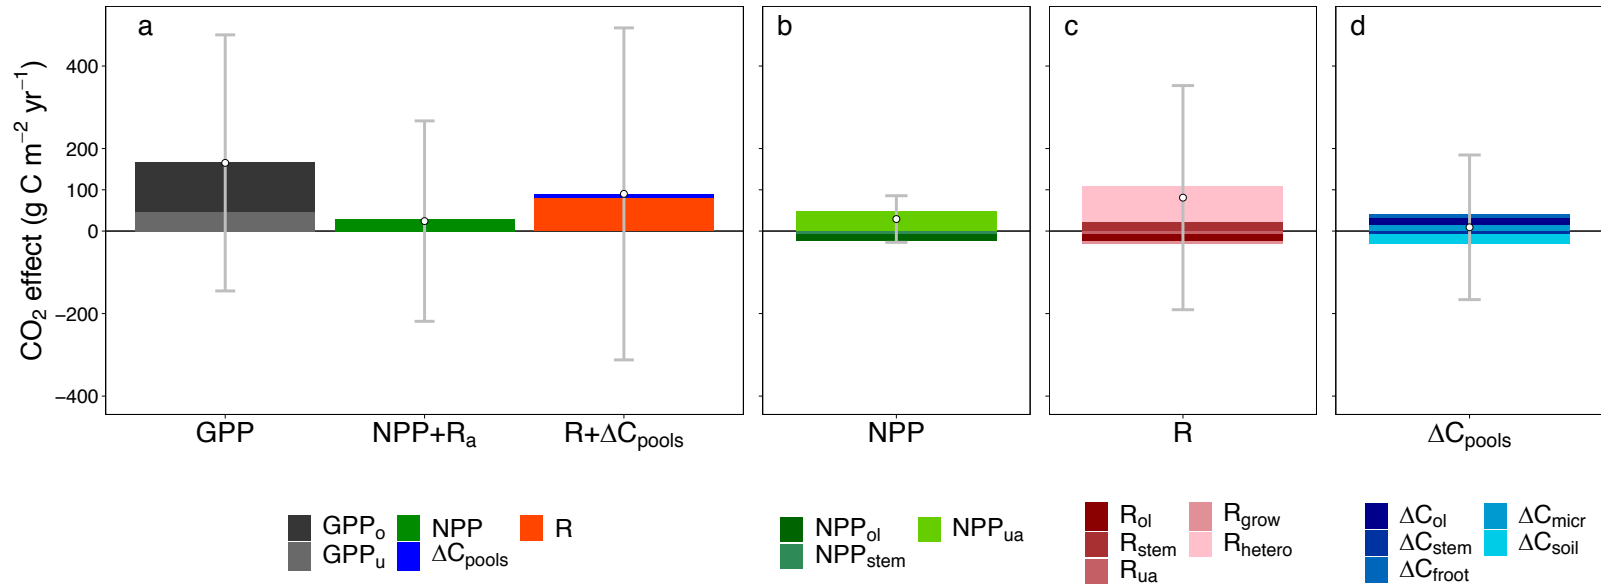

846

847 **Extended Data Figure 3. The fate of additional carbon fixed under elevated CO<sub>2</sub> (eCO<sub>2</sub>) in a mature forest ecosystem (non-normalized**

848 **analysis case). a)** Column “GPP” represents the total eCO<sub>2</sub> induced increase in overstorey and understorey gross primary production (GPP<sub>o</sub> and

849 GPP<sub>u</sub>, respectively), column “NPP + R<sub>a</sub>” represents the sum of net primary production and autotrophic respiration eCO<sub>2</sub> response, and column “R

850 + ΔC<sub>pools</sub>” represents the sum of ecosystem respiration and carbon storage eCO<sub>2</sub> response. **b)** The relative contributions of individual NPP fluxes

851 to the aggregated NPP response to eCO<sub>2</sub>, including overstorey leaf (NPP<sub>ol</sub>), stem (NPP<sub>stem</sub>), and understorey aboveground (NPP<sub>ua</sub>).

852 **c)** The relative contributions of individual respiratory fluxes to the aggregated R response to eCO<sub>2</sub>, including overstorey leaf (R<sub>ol</sub>), stem (R<sub>stem</sub>), understorey

853 aboveground (R<sub>ua</sub>), growth (R<sub>grow</sub>), and heterotroph (R<sub>hetero</sub>).

854 **d)** The relative contributions of individual change in carbon storage to the aggregated ΔC<sub>pools</sub> response to eCO<sub>2</sub>, including overstorey leaf (ΔC<sub>ol</sub>), stem (ΔC<sub>stem</sub>), fineroot (ΔC<sub>frroot</sub>), microbe (ΔC<sub>micr</sub>), and soil (ΔC<sub>soil</sub>). Variables with an

855 average CO<sub>2</sub> effect of < 5 gCm<sup>-2</sup>yr<sup>-1</sup> were excluded from the figure for better visual clarification. Each color represents a flux variable, point  
856 indicates the net sum of all variables for a column, and the grey confidence interval represents plot-level standard deviation (n=3) of the estimated  
857 column sum.

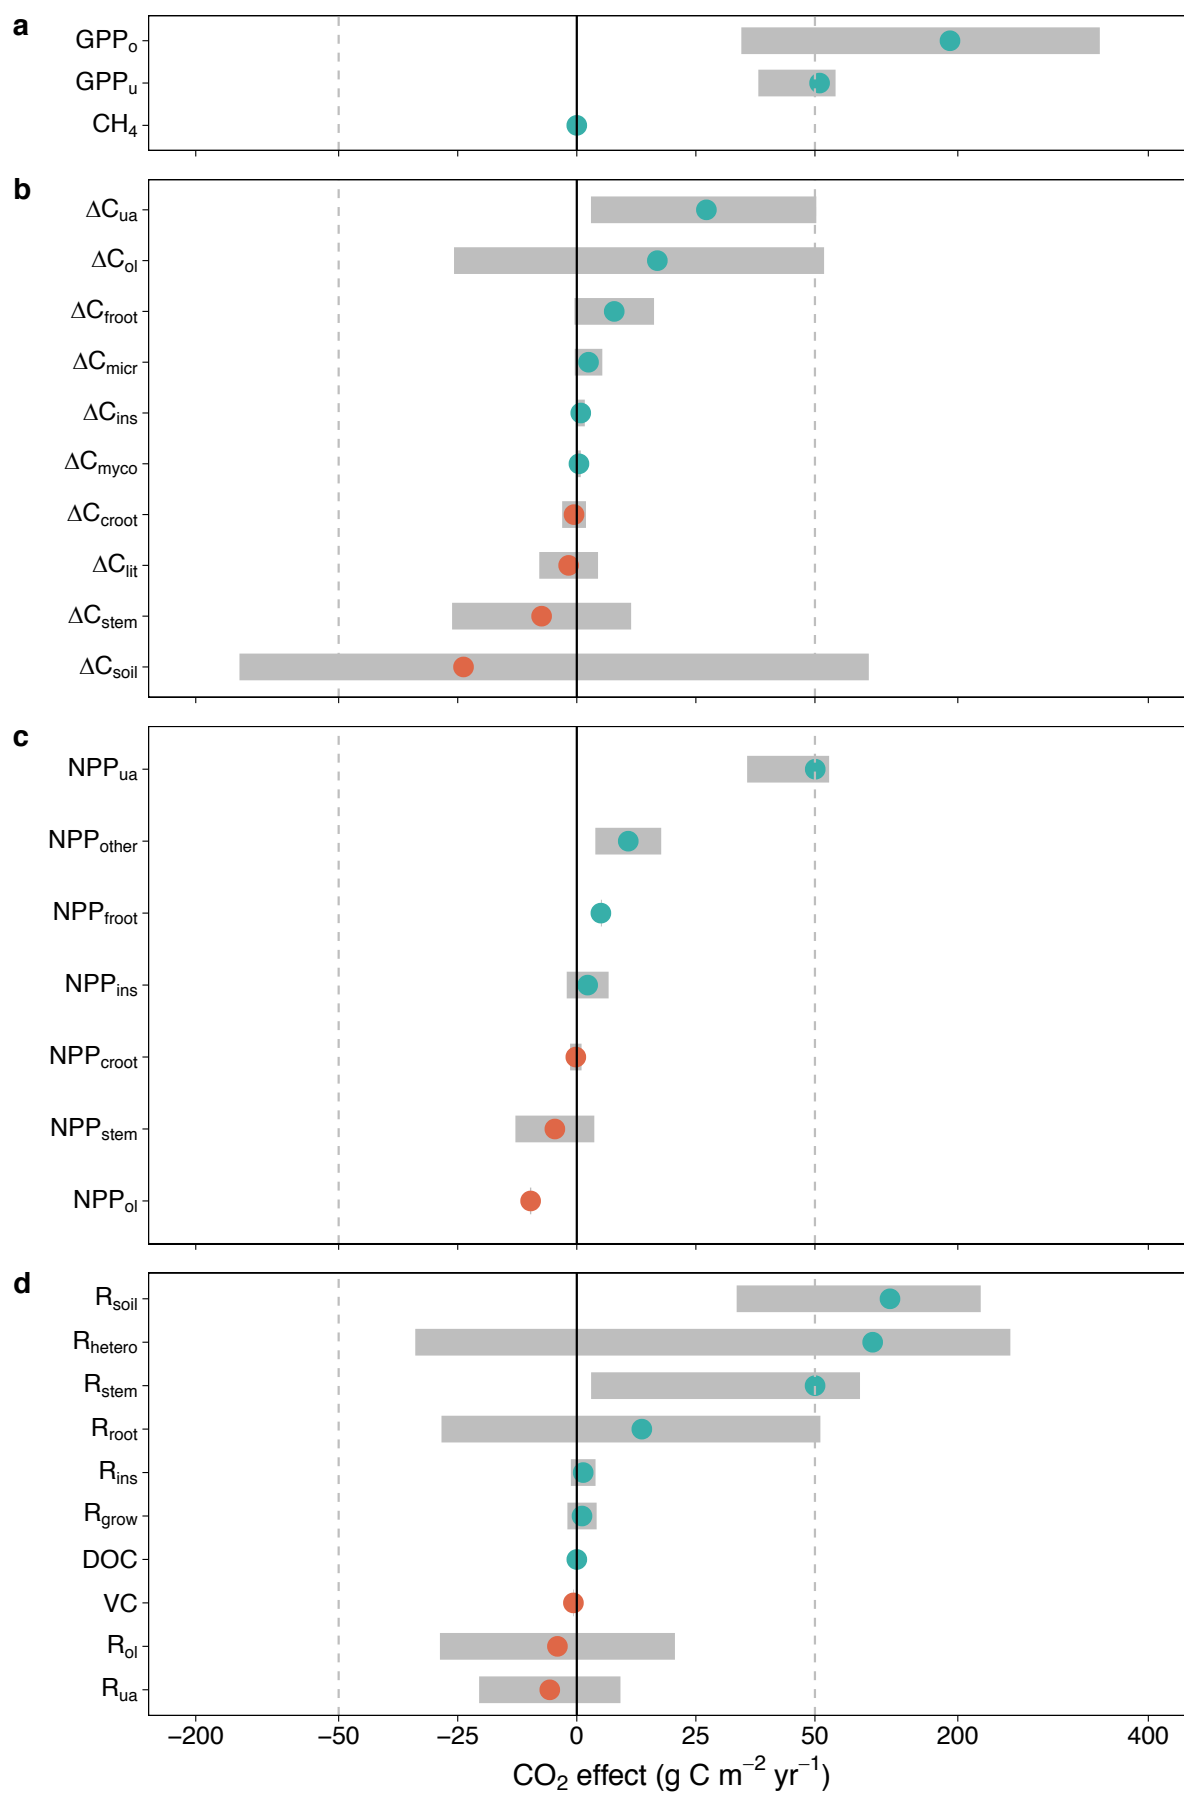

859 **Extended Data Figure 4. CO<sub>2</sub> treatment effect (gCm<sup>-2</sup>yr<sup>-1</sup>) for all ecosystem fluxes at**  
860 **EucFACE. a)** The CO<sub>2</sub> response of gross ecosystem carbon uptake, including gross primary  
861 production of overstorey (GPP<sub>o</sub>) and understorey (GPP<sub>u</sub>), and soil methane uptake (CH<sub>4</sub>). **b)**  
862 The eCO<sub>2</sub> response of annual incremental change in carbon pool ( $\Delta C_{\text{pools}}$ ), including overstorey  
863 leaf ( $\Delta C_{\text{ol}}$ ), stem ( $\Delta C_{\text{stem}}$ ), coarse root ( $\Delta C_{\text{croot}}$ ), fineroot ( $\Delta C_{\text{froot}}$ ), understorey aboveground  
864 ( $\Delta C_{\text{ua}}$ ), leaf litter ( $\Delta C_{\text{lit}}$ ), soil ( $\Delta C_{\text{soil}}$ ), microbe ( $\Delta C_{\text{micr}}$ ), aboveground insect ( $\Delta C_{\text{ins}}$ ), and  
865 mycorrhizae ( $\Delta C_{\text{myco}}$ ). **c)** The eCO<sub>2</sub> response of net primary production (NPP), including  
866 overstorey leaf (NPP<sub>ol</sub>), stem (NPP<sub>stem</sub>), coarse root (NPP<sub>croot</sub>), fineroot (NPP<sub>froot</sub>), understorey  
867 aboveground (NPP<sub>ua</sub>), twigs, barks and seeds (NPP<sub>other</sub>), and leaf insect consumption (NPP<sub>ins</sub>).  
868 **d)** The eCO<sub>2</sub> response of ecosystem respiration (R) and other out-going flux, including  
869 respiration fluxes of overstorey leaf (R<sub>ol</sub>), stem (R<sub>stem</sub>), root (R<sub>root</sub>), understorey aboveground  
870 (R<sub>ua</sub>), growth (R<sub>grow</sub>), insect (R<sub>ins</sub>), heterotroph (R<sub>hetero</sub>), and soil (R<sub>soil</sub>), and volatile carbon  
871 emission (VC) and dissolved organic carbon leaching (DOC). Dots and grey bars represent  
872 means and standard deviations of the CO<sub>2</sub> treatment difference, predicted by a linear mixed-  
873 model with plot-specific pre-treatment leaf area index as a covariate. Orange dots indicate  
874 negative means and light green dots indicate positive means. Dashed lines indicate change of  
875 scale along the x-axis.  
876
